# Supplementary material
Source: PubMed Central journal article supplement (PMC3816974)
Supplement: NIHMS522980-supplement-01.pdf [file NIHMS522980-supplement-01.pdf]

## Supplementary Information

### Structure-activity relationships of 2-aminothiazoles effective against *Mycobacterium tuberculosis*

Anja Meissner,<sup>a</sup> Helena I. Boshoff,<sup>b</sup> Mahalakshmi Vasana,<sup>a</sup> Benjamin P. Duckworth,<sup>a</sup> Clifton E. Barry, III,<sup>b</sup> Courtney C. Aldrich<sup>a\*</sup>

<sup>a</sup>Center for Drug Design, Academic Health Center, University of Minnesota, Minneapolis, Minnesota 55455

<sup>b</sup>Tuberculosis Research Section, National Institute of Allergy and Infectious Diseases, Bethesda, Maryland 20892

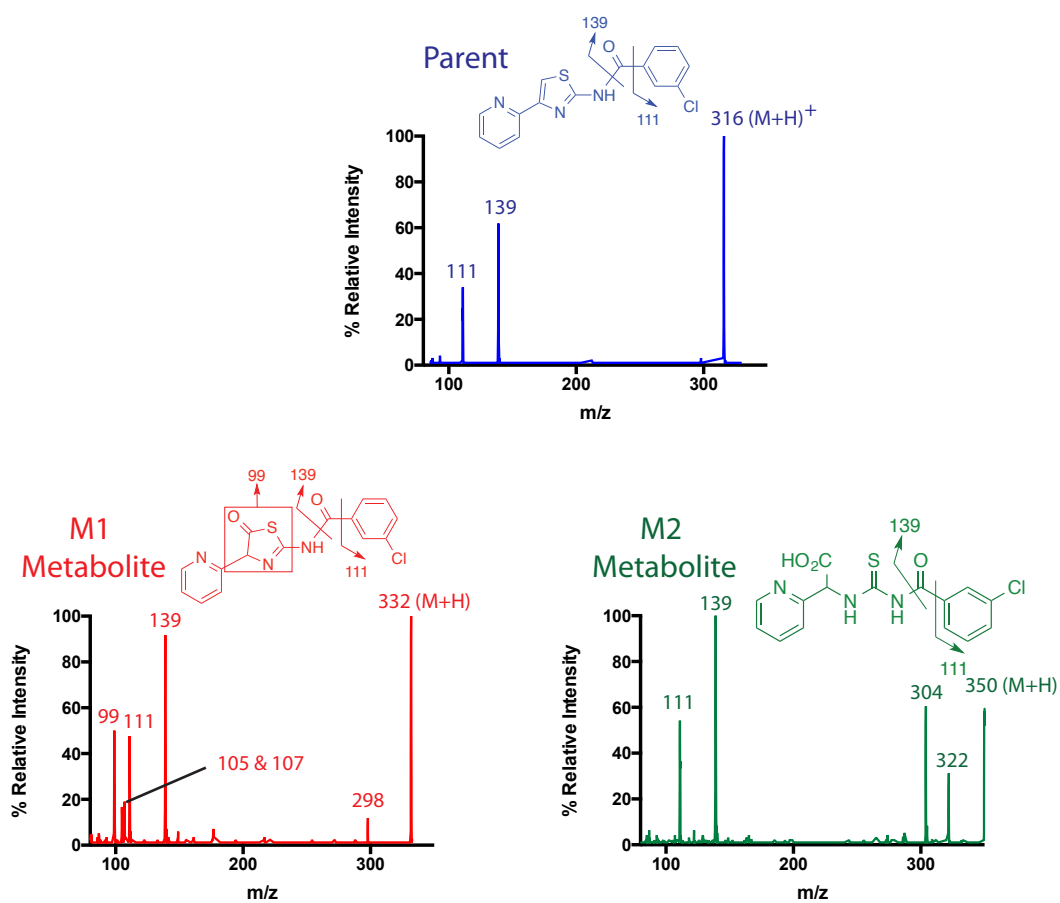

**Figure S1.** MS/MS of parent aminothiazole **55** and proposed Phase I metabolites.

## Experimentals

### ***N*-(2-Methylphenyl)-4-(2-pyridinyl)-1,3-thiazol-2-amine (2)**

Synthesized from 0.2 g 2-methylphenylthiourea using general procedure A, yielding 0.29 g (90%) of a white colored powder.  $R_f$  0.47 (DCM:MeOH 9:1);  $^1\text{H}$  NMR (600 MHz,  $\text{CDCl}_3$ )  $\delta$  2.35 (s, 3H), 7.09 (t,  $J = 7.2$  Hz, 1H), 7.24 (d,  $J = 8.4$  Hz, 1H), 7.26 (t,  $J = 7.2$  Hz, 1H), 7.31 (m, 1H), 7.38 (s, 1H), 7.81 (d,  $J = 7.8$  Hz, 1H), 7.86 (m, 1H), 8.01 (d,  $J = 7.8$  Hz, 1H), 8.52 (d,  $J = 4.2$  Hz, 1H);  $^{13}\text{C}$  NMR (150 MHz,  $\text{CDCl}_3$ )  $\delta$  17.8, 106.3, 120.6, 120.8, 122.4, 124.6, 127.2, 129.2, 131.1, 136.8, 138.7, 149.4, 151.1, 152.6, 166.4; HRMS (ESI+) calcd for  $\text{C}_{15}\text{H}_{14}\text{N}_3\text{S}$   $[\text{M} + \text{H}]^+$  268.0903, found 268.0905 (error 0.7 ppm).

### ***N*-(3-Methylphenyl)-4-(2-pyridinyl)-1,3-thiazol-2-amine (3)**

Synthesized from 0.2 g 3-methylphenylthiourea using general procedure A, yielding 0.28 g (88%) of a white colored powder.  $R_f$  0.53 (DCM:MeOH 9:1);  $^1\text{H}$  NMR (600 MHz,  $\text{CDCl}_3$ )  $\delta$  2.37 (s, 3H), 6.85 (d,  $J = 7.2$  Hz, 1H), 7.23 (t,  $J = 7.8$  Hz, 1H), 7.33 (ddd,  $J = 7.2, 4.8, 1.2$  Hz, 1H), 7.43 (s, 1H), 7.45 (s, 1H), 7.53 (d,  $J = 7.8$  Hz, 1H), 7.90 (td,  $J = 7.8, 1.8$  Hz, 1H), 8.10 (d,  $J = 7.8$  Hz, 1H), 8.54 (d,  $J = 4.8$  Hz, 1H);  $^{13}\text{C}$  NMR (150 MHz,  $\text{CD}_3\text{OD}$ )  $\delta$  21.9, 107.5, 115.9, 119.3, 122.8, 123.9, 124.0, 130.1, 139.1, 140.1, 142.7, 150.1, 151.8, 154.2, 166.1; HRMS (ESI+) calcd for  $\text{C}_{15}\text{H}_{14}\text{N}_3\text{S}$   $[\text{M} + \text{H}]^+$  268.0903, found 268.0909 (error 2.2 ppm).

### ***N*-(4-Methylphenyl)-4-(2-pyridinyl)-1,3-thiazol-2-amine (4)**

Synthesized from 0.2 g 4-methylphenylthiourea using general procedure A, yielding 0.29 g (90%) of a white colored powder.  $R_f$  0.52 (DCM:MeOH 9:1);  $^1\text{H}$  NMR (600 MHz,  $\text{CDCl}_3$ )  $\delta$  2.34 (s, 3H), 7.18 (d,  $J = 8.4$  Hz, 2H), 7.19-7.21 (m, 1H), 7.25 (bs, 1H), 7.29 (d,  $J = 7.8$  Hz, 2H), 7.39 (s, 1H), 7.74 (t,  $J = 7.8$  Hz, 1H), 7.97 (d,  $J = 7.8$  Hz, 1H), 8.60 (d,  $J = 4.2$  Hz, 1H);  $^{13}\text{C}$  NMR (150 MHz,  $\text{CDCl}_3$ )  $\delta$  20.8, 106.1, 118.9, 120.9, 122.5, 130.0, 133.1, 136.9, 137.7, 149.4, 151.0, 152.6, 165.3; HRMS (ESI+) calcd for  $\text{C}_{15}\text{H}_{14}\text{N}_3\text{S}$   $[\text{M} + \text{H}]^+$  268.0903, found 268.0909 (error 2.2 ppm).

### ***N*-(2,3-Dimethylphenyl)-4-(2-pyridinyl)-1,3-thiazol-2-amine (5)**

Synthesized from 0.2 g 2,3-dimethylphenylthiourea using general procedure A, yielding 0.27 g (87%) of a white colored powder.  $R_f$  0.45 (DCM:MeOH 9:1);  $^1\text{H}$  NMR (600 MHz,  $\text{CDCl}_3$ )  $\delta$  2.23 (s, 3H), 2.33 (s, 3H), 7.05 (d,  $J = 7.2$  Hz, 1H), 7.19-7.15 (m, 3H), 7.31 (s, 1H), 7.45 (t,  $J = 8.4$  Hz, 1H), 7.70 (t,  $J = 7.8$  Hz, 1H), 7.91 (d,  $J = 7.8$  Hz, 1H), 8.59 (d,  $J = 4.8$  Hz, 1H);  $^{13}\text{C}$  NMR (150 MHz,  $\text{CDCl}_3$ )  $\delta$  13.7, 20.6, 106.1, 120.5, 120.7, 122.3, 126.4, 127.3, 129.9, 136.7, 138.3, 138.6, 149.4, 151.2, 152.7, 168.0; HRMS (ESI+) calcd for  $\text{C}_{16}\text{H}_{16}\text{N}_3\text{S}$   $[\text{M} + \text{H}]^+$  282.1059, found 282.1061 (error 0.7 ppm).

### ***N*-(2,4-Dimethylphenyl)-4-(2-pyridinyl)-1,3-thiazol-2-amine (6)**

Synthesized from 0.2 g 2,4-dimethylphenylthiourea using general procedure A, yielding 0.28 g (90%) of a white colored powder.  $R_f$  0.34 (DCM:MeOH 9:1);  $^1\text{H}$  NMR (600 MHz,  $\text{CDCl}_3$ )  $\delta$  2.29 (s, 3H), 2.33 (s, 3H), 7.07 (d,  $J = 6.6$  Hz, 2H), 7.08 (br s, 1H), 7.18 (t,  $J = 6.0$  Hz, 1H), 7.31 (s, 1H), 7.49 (d,  $J = 8.4$  Hz, 1H), 7.70 (t,  $J = 7.8$  Hz, 1H), 7.92 (d,  $J = 7.8$  Hz, 1H), 8.59 (d,  $J = 4.2$  Hz, 1H);  $^{13}\text{C}$  NMR (150 MHz,  $\text{CDCl}_3$ )  $\delta$  17.7, 20.9, 106.1, 120.7, 122.0, 122.4, 127.7, 130.4, 131.9, 135.0, 136.1, 136.7, 149.4, 151.2, 152.7, 167.6; HRMS (ESI+) calcd for  $\text{C}_{16}\text{H}_{16}\text{N}_3\text{S}$   $[\text{M} + \text{H}]^+$  282.1059, found 282.1050 (error 3.2 ppm).

***N*-(2,6-Dimethylphenyl)-4-(2-pyridinyl)-1,3-thiazol-2-amine (7)**

Synthesized from 0.2 g 2,6-dimethylphenylthiourea using general procedure A, yielding 0.26 g (84%) of a white colored powder.  $R_f$  0.39 (DCM:MeOH 9:1);  $^1\text{H}$  NMR (600 MHz,  $\text{CDCl}_3$ )  $\delta$  2.32 (s, 6H), 7.12 (dd,  $J = 7.6, 4.7$  Hz, 1H), 7.19-7.14 (m, 3H), 7.20 (s, 1H), 7.57 (t,  $J = 7.2$  Hz, 1H), 7.58 (br s, 1H), 7.79 (d,  $J = 7.8$  Hz, 1H), 8.51 (d,  $J = 4.8$  Hz, 1H);  $^{13}\text{C}$  NMR (150 MHz,  $\text{CDCl}_3$ )  $\delta$  18.2, 105.9, 120.5, 122.2, 128.0, 128.9, 136.5, 137.1, 137.4, 149.4, 151.4, 152.6, 170.4; HRMS (ESI+) calcd for  $\text{C}_{16}\text{H}_{16}\text{N}_3\text{S}$  [ $\text{M} + \text{H}$ ] $^+$  282.1059, found 282.1056 (error 1.1 ppm).

***N*-(2,4-Dimethoxyphenyl)-4-(2-pyridinyl)-1,3-thiazol-2-amine (8)**

Synthesized from 0.2 g 2,4-dimethoxyphenylthiourea using general procedure A, yielding 0.28 g (90%) of a white colored powder.  $R_f$  0.43 (DCM:MeOH 9:1);  $^1\text{H}$  NMR (600 MHz,  $\text{CDCl}_3$ )  $\delta$  3.82 (s, 3H), 3.87 (s, 3H), 6.56-6.53 (m, 2H), 7.19 (ddd,  $J = 7.8, 4.8, 1.2$  Hz, 1H), 7.38 (s, 1H), 7.49 (br s, 1H), 7.74 (td,  $J = 7.8, 1.8$  Hz, 1H), 7.93 (d,  $J = 8.4$  Hz, 1H), 8.02 (d,  $J = 7.8$  Hz, 1H), 8.60 (d,  $J = 4.2$  Hz, 1H);  $^{13}\text{C}$  NMR (150 MHz,  $\text{CDCl}_3$ )  $\delta$  55.6, 55.7, 99.1, 103.8, 105.8, 118.5, 121.0, 122.3, 123.7, 136.8, 149.3, 149.5, 151.1, 152.7, 155.8, 165.1; HRMS (ESI+) calcd for  $\text{C}_{16}\text{H}_{16}\text{N}_3\text{O}_2\text{S}$  [ $\text{M} + \text{H}$ ] $^+$  314.0958, found 314.0957 (error 0.3 ppm).

***N*-(2,5-Dimethoxyphenyl)-4-(2-pyridinyl)-1,3-thiazol-2-amine (9)**

Synthesized from 0.2 g 2,5-dimethoxyphenylthiourea using general procedure A, yielding 0.25 g (86%) of a white colored powder.  $R_f$  0.55 (DCM:MeOH 9:1);  $^1\text{H}$  (600 MHz,  $\text{CDCl}_3$ )  $\delta$  3.83 (s, 3H), 3.88 (s, 3H), 6.54 (dd,  $J = 8.8, 2.9$  Hz, 1H), 6.92 (d,  $J = 8.8$  Hz, 1H), 7.33 (ddd,  $J = 7.5, 4.8, 1.2$  Hz, 1H), 7.48 (s, 1H), 7.91 (td,  $J = 7.8, 1.8$  Hz, 1H), 8.11 (d,  $J = 7.9$  Hz, 1H), 8.24 (d,  $J = 3.2$  Hz, 1H), 8.54 (dt,  $J = 4.0, 0.8$  Hz, 1H);  $^{13}\text{C}$  NMR (150 MHz,  $\text{CDCl}_3$ )  $\delta$  55.7, 56.3, 103.6, 105.5, 106.5, 110.8, 121.0, 122.4, 130.7, 136.9, 141.6, 149.4, 151.2, 152.7, 154.1, 163.1; HRMS (ESI+) calcd for  $\text{C}_{16}\text{H}_{16}\text{N}_3\text{O}_2\text{S}$  [ $\text{M} + \text{H}$ ] $^+$  314.0958, found 314.0950 (error 2.5 ppm).

***N*-(2-Fluorophenyl)-4-(2-pyridinyl)-1,3-thiazol-2-amine (10)**

Synthesized from 0.2 g 2-fluorophenylthiourea using general procedure A, yielding 0.30 g (94%) of a white colored powder.  $R_f$  0.55 (DCM:MeOH 9:1);  $^1\text{H}$  NMR (600 MHz,  $\text{CDCl}_3$ )  $\delta$  7.00 (td,  $J = 6.6, 6.0$  Hz, 1H), 7.13 (dd,  $J = 7.8, 10.8$  Hz, 1H), 7.20 (d,  $J = 7.8$  Hz, 1H), 7.22 (d,  $J = 5.4$  Hz, 1H), 7.39 (br s, 1H), 7.50 (s, 1H), 7.77 (td,  $J = 7.8, 1.2$  Hz, 1H), 8.04 (d,  $J = 7.8$  Hz, 1H), 8.21 (td,  $J = 7.8, 1.2$  Hz, 1H), 8.61 (d,  $J = 4.2$  Hz, 1H);  $^{13}\text{C}$  NMR (150 MHz,  $\text{CDCl}_3$ )  $\delta$  107.1, 115.1 (d,  $J = 19$  Hz), 118.3, 121.0, 122.5, 122.6 (d,  $J = 9.6$  Hz), 124.7 (d,  $J = 3.9$  Hz), 128.8, 136.9, 149.4, 151.3, 151.8 (d,  $J = 241$  Hz), 152.5, 163.0; HRMS (ESI+) calcd for  $\text{C}_{14}\text{H}_{11}\text{FN}_3\text{S}$  [ $\text{M} + \text{H}$ ] $^+$  272.0652, found 272.0658 (error 2.2 ppm).

***N*-(3-Fluorophenyl)-4-(2-pyridinyl)-1,3-thiazol-2-amine (11)**

Synthesized from 0.2 g 3-fluorophenylthiourea using general procedure A, yielding 0.28 g (88%) of a white colored powder.  $R_f$  0.56 (DCM:MeOH 9:1);  $^1\text{H}$  NMR (600 MHz,  $\text{CDCl}_3$ )  $\delta$  6.75 (td,  $J = 8.4, 2.4$  Hz, 1H), 7.09 (dd,  $J = 7.8, 1.8$  Hz, 1H), 7.22 (dd,  $J = 6.6, 5.4$  Hz, 1H), 7.28 (dd,  $J = 15, 8.4$  Hz, 1H), 7.42 (dt,  $J = 10.8, 2.4$  Hz, 1H), 7.48 (s, 1H), 7.65 (br s, 1H), 7.77 (td,  $J = 7.8, 1.2$  Hz, 1H), 8.02 (d,  $J = 8.4$  Hz, 1H), 8.61 (d,  $J = 4.2$  Hz, 1H);  $^{13}\text{C}$  NMR (150 MHz,  $\text{CDCl}_3$ )  $\delta$  105.0 (d,  $J = 26.3$  Hz), 106.9, 109.3 (d,  $J = 21.2$  Hz), 113.1 (d,  $J = 2.9$  Hz), 121.1, 122.7, 130.5 (d,  $J = 9.5$  Hz), 137.0, 141.8 (d,  $J = 10.7$  Hz), 149.4, 151.2, 152.4, 163.36, 163.45 (d,  $J = 243$  Hz); HRMS (ESI+) calcd for  $\text{C}_{14}\text{H}_{11}\text{FN}_3\text{S}$  [ $\text{M} + \text{H}$ ] $^+$  272.0652, found 272.0653 (error 0.4 ppm).

***N*-(4-Fluorophenyl)-4-(2-pyridinyl)-1,3-thiazol-2-amine (12)**

Synthesized from 0.2 g 4-fluorophenylthiourea using general procedure A, yielding 0.28 g (88%) of a white colored powder.  $R_f$  0.46 (DCM:MeOH 9:1);  $^1\text{H}$  NMR (600 MHz,  $\text{CDCl}_3$ )  $\delta$  7.05 (t,  $J$  = 8.4 Hz, 1H), 7.20 (dd,  $J$  = 7.2, 4.8 Hz, 2H), 7.39 (s, 1H), 7.41-7.39 (m, 2H), 7.67 (br s, 1H), 7.72 (t,  $J$  = 7.8 Hz, 1H), 7.97 (d,  $J$  = 7.8 Hz, 1H), 8.59 (d,  $J$  = 4.8 Hz, 1H);  $^{13}\text{C}$  NMR (150 MHz,  $\text{CDCl}_3$ )  $\delta$  106.2, 116.1 (d,  $J$  = 22.8 Hz), 120.7 (d,  $J$  = 7.8 Hz), 121.7 (d,  $J$  = 240 Hz), 136.5 (d,  $J$  = 2.9 Hz), 136.9, 149.4, 151.1, 152.5, 158.1, 159.7, 165.3; HRMS (ESI+) calcd for  $\text{C}_{14}\text{H}_{11}\text{FN}_3\text{S}$   $[\text{M} + \text{H}]^+$  272.0652, found 272.0651 (error 0.4 ppm).

***N*-(2-Trifluoromethylphenyl)-4-(2-pyridinyl)-1,3-thiazol-2-amine (13)**

Synthesized from 0.2 g 2-Trifluoromethylphenylthiourea using general procedure A, yielding 0.25 g (86%) of a white colored powder.  $R_f$  0.54 (DCM:MeOH 9:1);  $^1\text{H}$  NMR (600 MHz,  $\text{CDCl}_3$ )  $\delta$  7.18 (t,  $J$  = 7.8 Hz, 1H), 7.21 (dd,  $J$  = 7.2, 4.8 Hz, 1H), 7.39 (s, 1H), 7.50 (s, 1H), 7.59 (t,  $J$  = 7.8 Hz, 1H), 7.65 (d,  $J$  = 7.2 Hz, 1H), 7.76 (td,  $J$  = 7.8, 1.2 Hz, 1H), 8.00 (d,  $J$  = 7.8 Hz, 1H), 8.18 (d,  $J$  = 7.8 Hz, 1H), 8.61 (d,  $J$  = 4.2 Hz, 1H);  $^{13}\text{C}$  NMR (150 MHz,  $\text{CDCl}_3$ )  $\delta$  107.6, 118.8 (q,  $J$  = 29.4 Hz), 120.4, 121.0, 122.6, 122.8, 124.2 (q,  $J$  = 271 Hz), 126.7 (q,  $J$  = 5.4 Hz), 133.2 (q,  $J$  = 1.1 Hz), 136.9, 138.5, 149.4, 151.4, 152.4, 163.7; HRMS (ESI+) calcd for  $\text{C}_{15}\text{H}_{11}\text{F}_3\text{N}_3\text{S}$   $[\text{M} + \text{H}]^+$  322.0620, found 322.0618 (error 0.6 ppm).

***N*-(3-Trifluoromethylphenyl)-4-(2-pyridinyl)-1,3-thiazol-2-amine (14)**

Synthesized from 0.2 g 3-trifluoromethylphenylthiourea using general procedure A, yielding 0.26 g (89%) of a white colored powder.  $R_f$  0.57 (DCM:MeOH 9:1);  $^1\text{H}$  NMR (600 MHz,  $\text{CDCl}_3$ )  $\delta$  7.22 (dd,  $J$  = 6.6, 5.4 Hz, 1H), 7.28 (d,  $J$  = 7.8 Hz, 1H), 7.43 (t,  $J$  = 8.1 Hz, 1H), 7.48 (s, 1H), 7.61 (d,  $J$  = 7.8 Hz, 1H), 7.77 (td,  $J$  = 7.8, 1.2 Hz, 1H), 7.90 (s, 1H), 8.01 (s, 1H), 8.01 (d,  $J$  = 7.8 Hz, 1H), 8.60 (d,  $J$  = 4.2 Hz, 1H);  $^{13}\text{C}$  NMR (150 MHz,  $\text{CDCl}_3$ )  $\delta$  107.1, 114.5 (q,  $J$  = 3.9 Hz), 119.0 (q,  $J$  = 3.9 Hz), 120.5, 121.1, 122.7, 123.9 (q,  $J$  = 271 Hz), 129.8, 131.7 (q,  $J$  = 31.8 Hz), 137.1, 140.8, 149.3, 151.1, 152.3, 163.3; HRMS (ESI+) calcd for  $\text{C}_{15}\text{H}_{11}\text{F}_3\text{N}_3\text{S}$   $[\text{M} + \text{H}]^+$  322.0620, found 322.0624 (error 1.2 ppm).

***N*-(4-Trifluoromethylphenyl)-4-(2-pyridinyl)-1,3-thiazol-2-amine (15)**

Synthesized from 0.2 g 4-trifluoromethylphenylthiourea using general procedure A, yielding 0.25 g (86%) of a white colored powder.  $R_f$  0.62 (DCM:MeOH 9:1);  $^1\text{H}$  NMR (600 MHz,  $\text{CDCl}_3$ )  $\delta$  7.21 (dd,  $J$  = 6.6, 5.4 Hz, 1H), 7.45 (s, 1H), 7.56 (d,  $J$  = 8.4 Hz, 2H), 7.64 (d,  $J$  = 9.0 Hz, 2H), 7.77 (t,  $J$  = 7.8 Hz, 1H), 8.01 (d,  $J$  = 8.4 Hz, 1H), 8.54 (d,  $J$  = 4.8 Hz, 1H);  $^{13}\text{C}$  NMR (150 MHz,  $\text{CDCl}_3$ )  $\delta$  107.3, 116.6, 121.2, 122.7, 123.6 (q,  $J$  = 38.9 Hz), 124.4 (q,  $J$  = 270 Hz), 126.5 (q,  $J$  = 3.7 Hz), 137.3, 143.5, 149.1, 150.8, 152.3, 163.0; HRMS (ESI+) calcd for  $\text{C}_{15}\text{H}_{11}\text{F}_3\text{N}_3\text{S}$   $[\text{M} + \text{H}]^+$  322.0620, found 322.0622 (error 0.6 ppm).

***N*-(2-Hydroxyphenyl)-4-(2-pyridinyl)-1,3-thiazol-2-amine (16)**

Synthesized from 0.2 g 2-hydroxyphenylthiourea using general procedure A, yielding 0.26 g (81%) of a white colored powder.  $R_f$  0.17 (DCM:MeOH 9:1);  $^1\text{H}$  NMR (600 MHz,  $\text{CDCl}_3$ )  $\delta$  6.85 (td,  $J$  = 7.5, 1.8 Hz, 1H), 6.94-6.90 (m, 2H), 7.18 (dd,  $J$  = 7.2, 5.4 Hz, 1H), 7.33 (s, 1H), 7.54 (d,  $J$  = 8.4 Hz, 1H), 7.74 (td,  $J$  = 7.8, 1.8 Hz, 1H), 7.90 (d,  $J$  = 7.8 Hz, 1H), 8.48 (d,  $J$  = 4.8 Hz, 1H);  $^{13}\text{C}$  NMR (150 MHz,  $\text{CDCl}_3$ )  $\delta$  106.6, 116.9, 119.3, 120.3, 121.2, 122.7, 124.0, 128.9,

137.5, 146.7, 148.9, 149.7, 152.0, 165.7; HRMS (ESI+) calcd for C<sub>14</sub>H<sub>12</sub>N<sub>3</sub>OS [M + H]<sup>+</sup> 270.0696, found 270.0698 (error 0.7 ppm).

#### ***N*-(Pyridyl)-4-(2-pyridinyl)-1,3-thiazol-2-amine (17)**

Synthesized from 0.2 g 2-pyridylthiourea using general procedure **A**, yielding 0.30 g (91%) of a white colored powder. *R<sub>f</sub>* 0.08 (DCM:MeOH 9:1); <sup>1</sup>H NMR (600 MHz, CDCl<sub>3</sub>) δ 6.81 (d, *J* = 8.4 Hz, 1H), 6.84 (t, *J* = 6.0 Hz, 1H), 7.18 (dd, *J* = 7.2, 4.8 Hz, 1H), 7.52 (s, 1H), 7.53 (t, *J* = 7.8 Hz, 1H), 7.71 (td, *J* = 7.8, 1.8 Hz, 1H), 7.91 (d, *J* = 8.4 Hz, 1H), 8.32 (d, *J* = 4.2 Hz, 1H), 8.57 (d, *J* = 4.2 Hz, 1H); <sup>13</sup>C NMR (150 MHz, CDCl<sub>3</sub>) δ 110.0, 110.5, 116.3, 120.7, 122.4, 137.0, 137.7, 146.8, 148.9, 149.3, 151.4, 152.6, 160.9; HRMS (ESI+) calcd for C<sub>13</sub>H<sub>11</sub>N<sub>4</sub>S [M + H]<sup>+</sup> 255.0699, found 255.0698 (error 0.4 ppm).

#### ***N*-(5-Chloropyridyl)-4-(2-pyridinyl)-1,3-thiazol-2-amine (18)**

Synthesized from 0.2 g 5-chloro-2-pyridylthiourea using general procedure **A**, yielding 0.27 g (87%) of a white colored powder. *R<sub>f</sub>* 0.20 (DCM:MeOH 9:1); <sup>1</sup>H NMR (600 MHz, CDCl<sub>3</sub>) δ 6.83 (d, *J* = 9.0 Hz, 1H), 7.18 (ddd, *J* = 7.8, 4.8, 1.2 Hz, 1H), 7.45 (s, 1H), 7.49 (dd, *J* = 8.4, 2.4 Hz, 1H), 7.71 (td, *J* = 7.8, 1.8 Hz, 1H), 7.85 (d, *J* = 8.4 Hz, 1H), 8.24 (d, *J* = 3.0 Hz, 1H), 8.53 (d, *J* = 4.8 Hz, 1H); <sup>13</sup>C NMR (150 MHz, CDCl<sub>3</sub>) δ 110.1, 111.4, 120.7, 122.5, 123.3, 137.1, 137.6, 145.0, 148.7, 149.0, 149.9, 152.4, 160.7; HRMS (ESI+) calcd for C<sub>13</sub>H<sub>10</sub>ClN<sub>4</sub>S [M + H]<sup>+</sup> 289.0309, found 289.0301 (error 2.8 ppm).

#### ***N*-(6-Methyl-2-pyridyl)-4-(2-pyridinyl)-1,3-thiazol-2-amine (19)**

Synthesized from 0.2 g 6-methyl-2-pyridylthiourea using general procedure **A**, yielding 0.27 g (84%) of a white colored powder. *R<sub>f</sub>* 0.24 (DCM:MeOH 9:1); <sup>1</sup>H (600 MHz, CDCl<sub>3</sub>) δ 2.51 (s, 3H), 6.64 (d, *J* = 7.8 Hz, 1H), 6.69 (d, *J* = 7.2 Hz, 1H), 7.18 (dd, *J* = 7.8, 4.8 Hz, 1H), 7.43 (t, *J* = 7.8 Hz, 1H), 7.47 (s, 1H), 7.71 (td, *J* = 7.5, 1.2 Hz, 1H), 7.88 (d, *J* = 7.8 Hz, 1H), 8.54 (d, *J* = 4.8 Hz, 1H); <sup>13</sup>C NMR (150 MHz, CDCl<sub>3</sub>) δ 23.5, 107.1, 110.1, 115.5, 120.7, 122.4, 137.2, 138.0, 148.4, 149.1, 150.7, 152.6, 156.1, 161.0; HRMS (ESI+) calcd for C<sub>14</sub>H<sub>13</sub>N<sub>4</sub>S [M + H]<sup>+</sup> 269.0855, found 269.0853 (error 0.7 ppm).

#### ***N*-[4-(2-Pyridinyl)-1,3-thiazol-2-yl]hexanamide (22)**

Synthesized from 50 mg hexanoic acid using general procedure **B** to obtain 85 mg (71%) of a white colored powder. *R<sub>f</sub>* 0.52 (DCM:MeOH 9:1); <sup>1</sup>H NMR (600 MHz, CDCl<sub>3</sub>) δ 0.81 (t, *J* = 7.2 Hz, 3H), 1.11 (quin, *J* = 7.2 Hz, 2H), 1.18 (quin, *J* = 7.2 Hz, 2H), 1.57 (quin, *J* = 7.8 Hz, 2H), 2.20 (t, *J* = 7.5 Hz, 2H), 7.22 (dd, *J* = 7.2, 4.8 Hz, 1H), 7.70 (s, 1H), 7.73 (td, *J* = 7.5, 1.2 Hz, 1H), 7.90 (d, *J* = 7.8 Hz, 1H), 8.64 (d, *J* = 4.2 Hz, 1H), 10.50 (s, 1H); <sup>13</sup>C NMR (150 MHz, CDCl<sub>3</sub>) δ 13.8, 22.2, 24.5, 31.1, 36.1, 112.0, 120.5, 122.7, 136.9, 149.3, 149.7, 152.2, 158.9, 171.3; HRMS (ESI+) calcd for C<sub>14</sub>H<sub>18</sub>N<sub>3</sub>OS [M + H]<sup>+</sup> 276.1165, found 276.1168 (error 1.1 ppm).

#### ***N*-[4-(2-Pyridinyl)-1,3-thiazol-2-yl]octanamide (23)**

Synthesized from 50 mg octanoic acid using general procedure **B** to obtain 90 mg (86%) of a white colored powder. *R<sub>f</sub>* 0.56 (DCM:MeOH 9:1); <sup>1</sup>H NMR (600 MHz, CDCl<sub>3</sub>) δ 0.83 (t, *J* = 7.5 Hz, 3H), 1.16-1.07 (m, 6H), 1.21 (quin, *J* = 7.2 Hz, 2H), 1.53 (quin, *J* = 7.2 Hz, 2H), 2.16 (t, *J* = 7.8 Hz, 2H), 7.21 (dd, *J* = 7.2, 4.8 Hz, 1H), 7.70 (s, 1H), 7.72 (t, *J* = 7.2 Hz, 1H), 7.89 (d, *J* = 8.4 Hz, 1H), 8.63 (d, *J* = 4.2 Hz, 1H), 10.78 (s, 1H); <sup>13</sup>C NMR (150 MHz, CDCl<sub>3</sub>) δ 14.0, 22.5, 24.9,

28.7, 28.9, 31.5, 36.1, 112.0, 120.5, 122.7, 136.9, 149.2, 149.7, 152.2, 159.2, 171.4; HRMS (ESI+) calcd for C<sub>16</sub>H<sub>22</sub>N<sub>3</sub>OS [M + H]<sup>+</sup> 304.1478, found 304.1480 (error 0.7 ppm).

#### ***N*-[4-(2-Pyridinyl)-1,3-thiazol-2-yl]decanamide (24)**

Synthesized from 50 mg decanoic acid using general procedure **B** to obtain 81 mg (84%) of a white colored powder. *R<sub>f</sub>* 0.60 (DCM:MeOH 9:1); <sup>1</sup>H NMR (600 MHz, CDCl<sub>3</sub>) δ 0.85 (t, *J* = 7.2 Hz, 3H), 1.26-1.07 (m, 12H), 1.52 (quin, *J* = 7.2 Hz, 2H), 2.15 (t, *J* = 7.8 Hz, 2H), 7.21 (dd, *J* = 7.2, 5.4 Hz, 1H), 7.70 (s, 1H), 7.72 (td, *J* = 7.8, 1.2 Hz, 1H), 7.89 (d, *J* = 7.8 Hz, 1H), 8.63 (d, *J* = 4.2 Hz, 1H), 10.82 (s, 1H); <sup>13</sup>C NMR (150 MHz, CDCl<sub>3</sub>) δ 14.0, 22.6, 24.9, 29.0, 29.10, 29.14, 29.3, 31.8, 36.1, 112.0, 120.5, 122.7, 136.8, 149.2, 149.7, 152.2, 159.2, 171.4; HRMS (ESI-) calcd for C<sub>18</sub>H<sub>26</sub>N<sub>3</sub>OS [M + H]<sup>-</sup> 332.1791, found 332.1783 (error 2.4 ppm).

#### ***N*-[4-(2-Pyridinyl)-1,3-thiazol-2-yl]cyclopropanecarboxamide (25)**

Synthesized from 50 mg cyclopropanoic acid using general procedure **B** to obtain 90 mg (52%) of a white colored powder. *R<sub>f</sub>* 0.49 (DCM:MeOH 9:1); <sup>1</sup>H NMR (600 MHz, CDCl<sub>3</sub>) δ 0.99-0.96 (m, 2H), 1.06-1.03 (m, 2H), 1.88 (tt, *J* = 7.9, 4.6 Hz, 1H), 7.32 (ddd, *J* = 7.4, 4.9, 1.2 Hz, 1H), 7.71 (s, 1H), 7.86 (td, *J* = 7.8, 1.8 Hz, 1H), 8.07 (dt, *J* = 7.9, 1.0 Hz, 1H), 8.54 (ddd, *J* = 4.8, 1.7, 0.9 Hz, 1H); <sup>13</sup>C NMR (150 MHz, CDCl<sub>3</sub>) δ 9.2, 15.0, 112.8, 122.6, 124.2, 139.0, 150.2, 150.5, 154.0, 160.0, 174.6; HRMS (ESI+) calcd for C<sub>12</sub>H<sub>12</sub>N<sub>3</sub>OS [M + H]<sup>+</sup> 246.0696, found 246.0698 (error 0.8 ppm).

#### ***N*-[4-(2-Pyridinyl)-1,3-thiazol-2-yl]cyclobutanecarboxamide (26)**

Synthesized from 50 mg cyclobutanoic acid using general procedure **B** to obtain 68 mg (54%) of a white colored powder. *R<sub>f</sub>* 0.51 (DCM:MeOH 9:1); <sup>1</sup>H NMR (600 MHz, CD<sub>3</sub>OD) δ 1.95-1.90 (m, 1H), 2.08-2.02 (m, 1H), 2.27-2.21 (m, 2H), 2.36 (quin d, *J* = 9.0, 2.4 Hz, 2H), 3.36 (quin, *J* = 8.4 Hz, 1H), 7.28 (dd, *J* = 7.8, 4.8 Hz, 1H), 7.70 (s, 1H), 7.82 (td, *J* = 7.8, 1.2 Hz, 1H), 8.02 (d, *J* = 7.8 Hz, 1H), 8.51 (d, *J* = 5.4 Hz, 1H); <sup>13</sup>C NMR (150 MHz, CD<sub>3</sub>OD) δ 19.2, 26.1, 40.5, 112.9, 122.5, 124.1, 138.9, 150.1, 150.4, 153.9, 159.9, 175.5; HRMS (ESI+) calcd for C<sub>13</sub>H<sub>14</sub>N<sub>3</sub>OS [M + H]<sup>+</sup> 260.0852, found 260.0850 (error 0.8 ppm).

#### ***N*-[4-(2-Pyridinyl)-1,3-thiazol-2-yl]cyclopentanecarboxamide (27)**

Synthesized from 50 mg cyclopentanoic acid using general procedure **B** to obtain 113 mg (95%) of a white colored powder. *R<sub>f</sub>* 0.54 (DCM:MeOH 9:1); <sup>1</sup>H NMR (600 MHz, CD<sub>3</sub>OD + (CD<sub>3</sub>)<sub>2</sub>CO) δ 1.66 (m, 2H), 1.78 (m, 2H), 1.86 (m, 2H), 1.97 (m, 2H), 2.94 (q, *J* = 8.0 Hz, 1H), 7.73 (s, 1H), 7.32-7.30 (m, 1H), 7.86 (td, *J* = 7.8, 1.8 Hz, 1H), 8.06 (d, *J* = 7.8 Hz, 1H), 8.54 (m, 1H); <sup>13</sup>C NMR (150 MHz, CDCl<sub>3</sub> + (CD<sub>3</sub>)<sub>2</sub>CO) δ 27.2, 31.5, 46.2, 112.9, 122.5, 124.2, 138.9, 150.2, 150.5, 154.0, 160.0, 177.0; HRMS (ESI+) calcd for C<sub>14</sub>H<sub>16</sub>N<sub>3</sub>OS [M + H]<sup>+</sup> 274.1009, found 274.1010 (error 0.4 ppm).

#### ***N*-[4-(2-Pyridinyl)-1,3-thiazol-2-yl]cyclohexanecarboxamide (28)**

Synthesized from 50 mg cyclohexanoic acid using general procedure **B** to obtain 92 mg (82%) of a white colored powder. *R<sub>f</sub>* 0.56 (DCM:MeOH 9:1); <sup>1</sup>H NMR (600 MHz, (CD<sub>3</sub>)<sub>2</sub>CO) δ 1.27 (m, 3H), 1.51-1.58 (m, 2H), 1.66 (m, 1H), 1.77 (m, 2H), 1.92 (d, *J* = 12.9 Hz, 2H), 2.61 (tt, *J* = 11.7, 3.3 Hz, 1H), 7.25 (dd, *J* = 7.4, 5.0 Hz, 1H), 7.80 (t, *J* = 7.2 Hz, 1H), 7.81 (s, 1H), 7.96 (d, *J* = 7.6 Hz, 1H), 8.58 (d, *J* = 4.8 Hz, 1H), 11.05 (s, 1H); <sup>13</sup>C NMR (150 MHz, (CD<sub>3</sub>)<sub>2</sub>CO) δ 26.2, 26.4,

30.0, 45.2, 112.2, 121.0, 123.4, 137.7, 150.4, 150.6, 153.6, 159.3, 175.1; HRMS (ESI+) calcd for  $C_{15}H_{18}N_3OS$   $[M + H]^+$  288.1165, found 288.1168 (error 1.0 ppm).

### **2-Methyl-N-[4-(2-pyridinyl)-1,3-thiazol-2-yl]cyclopropanecarboxamide (29)**

Synthesized from 50 mg 2-methylcyclopropanoic acid using general procedure **B** to obtain 70 mg (54%) of a colorless powder.  $R_f$  0.48 (DCM:MeOH 9:1);  $^1H$  NMR (600 MHz,  $(CD_3)_2CO$ )  $\delta$  mixture of isomers (80:20) 0.80 (dt,  $J = 4.2, 7.2$  Hz, 0.8H), 0.98-1.01 (m, 0.2H), 1.09-1.12 (m, 0.2H), 1.15 (d,  $J = 6.6$  Hz, 2.4H), 1.19 (d,  $J = 6.0$  Hz, 0.6H), 1.23 (p,  $J = 4.2$  Hz, 0.8H), 1.27-1.30 (m, 0.2H), 1.41-1.46 (m, 0.8H), 1.81 (p,  $J = 4.2$  Hz, 0.8H), 2.12 (td,  $J = 5.4, 7.8$  Hz, 0.2H), 7.27 (dd,  $J = 4.8, 7.8$  Hz, 1H), 7.78 (s, 1H), 7.81 (td,  $J = 1.2, 7.8$  Hz, 1H), 7.96 (d,  $J = 8.4$  Hz, 1H), 8.57 (d,  $J = 4.2$  Hz, 1H), 11.29 (s, 1H);  $^{13}C$  NMR (150 MHz,  $(CD_3)_2CO$ )  $\delta$  12.7, 14.7, 17.6, 17.7, 18.4, 18.6, 21.2, 23.7, 112.5, 121.5, 123.9, 138.2, 150.9, 151.1, 154.2, 159.7, 172.9; HRMS (ESI+) calcd for  $C_{13}H_{14}N_3OS$   $[M + H]^+$  260.0852, found 260.0851 (error 0.4 ppm).

### **N-[4-(2-Pyridinyl)-1,3-thiazol-2-yl]furane-2-carboxamide (30)**

Synthesized from 50 mg 2-furancarboxylic acid using general procedure **B** to obtain 38 mg (50%) of a white colored powder.  $R_f$  0.52 (DCM:MeOH 9:1);  $^1H$  NMR (600 MHz,  $CD_3OD$ )  $\delta$  7.00 (m, 1H), 7.32 (ddd,  $J = 7.8, 4.8, 1.2$  Hz, 1H), 7.66 (t,  $J = 1.8$  Hz, 1H), 7.76 (s, 1H), 7.86 (td,  $J = 7.8, 1.8$  Hz, 1H), 8.09 (d,  $J = 7.8$  Hz, 1H), 8.35 (m, 1H), 8.54 (d,  $J = 5.4$  Hz, 1H);  $^{13}C$  (150 MHz,  $CDCl_3$ )  $\delta$  110.0, 113.3, 122.5, 122.6, 124.2, 139.0, 145.9, 148.2, 150.2, 150.7, 153.9, 159.9, 162.7; HRMS (ESI+) calcd for  $C_{13}H_{10}N_3O_2S$   $[M + H]^+$  272.0488, found 272.0484 (error 1.5 ppm).

### **N-[4-(2-Pyridinyl)-1,3-thiazol-2-yl]furane-3-carboxamide (31)**

Synthesized from 50 mg 3-furancarboxylic acid using general procedure **B** to obtain 40 mg (52%) of a white colored powder.  $R_f$  0.46 (DCM:MeOH 9:1);  $^1H$  NMR (600 MHz,  $CD_3OD$ )  $\delta$  6.70 (m, 1H), 7.34 (dd,  $J = 6.6, 5.4$  Hz, 1H), 7.42 (d,  $J = 3.0$  Hz, 1H), 7.80 (s, 1H), 7.82 (s, 1H), 7.88 (t,  $J = 7.2$  Hz, 1H), 8.12 (d,  $J = 8.4$  Hz, 1H), 8.56 (d,  $J = 4.2$  Hz, 1H);  $^{13}C$  NMR (150 MHz,  $CDCl_3$ )  $\delta$  112.2, 112.9, 117.1, 120.6, 122.7, 136.8, 145.4, 145.8, 149.5, 150.0, 152.3, 155.2, 157.4; HRMS (ESI+) calcd for  $C_{13}H_{10}N_3O_2S$   $[M + H]^+$  272.0488, found 272.0493 (error 1.8 ppm).

### **N-[4-(2-Pyridinyl)-1,3-thiazol-2-yl]thiophene-2-carboxamide (32)**

Synthesized from 50 mg 2-thiophenecarboxylic acid using general procedure **C**, to obtain 56 mg (50%) of a pale yellow powder.  $R_f$  0.48 (DCM:MeOH 9:1);  $^1H$  NMR (600 MHz,  $CD_3OD$ )  $\delta$  7.24 (dd,  $J = 4.8, 4.0$  Hz, 1H), 7.34 (dd,  $J = 7.0, 5.6$  Hz, 1H), 7.79 (s, 1H), 7.84 (dd,  $J = 5.0, 0.9$  Hz, 1H), 7.89 (td,  $J = 7.7, 1.6$  Hz, 1H), 8.04 (dd,  $J = 3.8, 0.9$  Hz, 1H), 8.12 (d,  $J = 7.9$  Hz, 1H), 8.56 (d,  $J = 4.7$  Hz, 1H);  $^{13}C$  NMR (150 MHz,  $CDCl_3$ )  $\delta$  112.3, 120.4, 122.6, 128.1, 130.0, 132.4, 136.4, 136.7, 149.5, 149.6, 152.0, 158.6, 159.7; HRMS (ESI+) calcd for  $C_{13}H_{10}N_3OS_2$   $[M + H]^+$  288.0260, found 288.0267 (error 2.4 ppm).

### **N-[4-(2-Pyridinyl)-1,3-thiazol-2-yl]thiophene-3-carboxamide (33)**

Synthesized from 50 mg 3-thiophenecarboxylic acid using general procedure **C** to obtain 59 mg (53%) of a pale yellow powder.  $R_f$  0.47 (DCM:MeOH 9:1);  $^1H$  NMR (600 MHz,  $CDCl_3$ )  $\delta$  7.18 (dd,  $J = 7.2, 5.4$  Hz, 1H), 7.34 (dd,  $J = 4.8, 3.0$  Hz, 1H), 7.54 (s, 1H), 7.62 (d,  $J = 5.4$  Hz, 1H), 7.70 (td,  $J = 7.8, 1.2$  Hz, 1H), 7.80 (d,  $J = 8.4$  Hz, 1H), 8.23 (d,  $J = 1.8$  Hz, 1H), 8.51 (d,  $J = 4.8$

Hz, 1H);  $^{13}\text{C}$  NMR (150 MHz,  $\text{CDCl}_3$ )  $\delta$  112.1, 120.8, 122.6, 126.6, 126.7, 130.6, 135.1, 137.2, 148.9, 149.0, 152.0, 158.8, 160.8; HRMS (ESI+) calcd for  $\text{C}_{13}\text{H}_{10}\text{N}_3\text{OS}_2$   $[\text{M} + \text{H}]^+$  288.0260, found 288.0258 (error 0.7 ppm).

#### ***N*-[4-(2-Pyridinyl)-1,3-thiazol-2-yl]thiazole-4-carboxamide (34)**

Synthesized from 50 mg 4-thiazolecarboxylic acid using general procedure C to obtain 50 mg (46%) of a pale yellow powder.  $R_f$  0.38 (DCM:MeOH 9:1);  $^1\text{H}$  NMR (600 MHz,  $\text{CDCl}_3$ )  $\delta$  7.22 (dd,  $J = 7.2, 5.4$  Hz, 1H), 7.76 (s, 1H), 7.76 (td,  $J = 7.8, 1.2$  Hz, 1H), 7.98 (d,  $J = 7.8$  Hz, 1H), 8.38 (d,  $J = 1.8$  Hz, 1H), 8.64 (d,  $J = 4.2$  Hz, 1H), 8.86 (d,  $J = 1.8$  Hz, 1H), 10.60 (s, 1H);  $^{13}\text{C}$  NMR (150 MHz,  $\text{CDCl}_3$ )  $\delta$  112.2, 120.7, 122.7, 125.6, 136.9, 148.9, 149.6, 150.2, 152.4, 153.4, 157.1, 158.2; HRMS (ESI+) calcd for  $\text{C}_{12}\text{H}_9\text{N}_4\text{OS}_2$   $[\text{M} + \text{H}]^+$  289.0212, found 289.0212 (error 0.0 ppm).

#### **2-[*N*-(2-Methylbenzoyl)amino]-4-(pyridin-2-yl)thiazole (36)**

Synthesized from 66 mg *ortho*-toluic acid using general procedure C to obtain 84 mg (81%) of a colorless solid.  $R_f$  0.64 (DCM:MeOH = 9:1);  $^1\text{H}$  NMR (600 MHz,  $\text{CDCl}_3$ )  $\delta$  2.38 (s, 3H), 6.87 (t,  $J = 7.3$  Hz, 1H), 6.95 (d,  $J = 7.6$  Hz, 1H), 7.05 (dd,  $J = 6.6, 5.4$  Hz, 1H), 7.09 (t,  $J = 7.5$  Hz, 1H), 7.18 (d,  $J = 7.6$  Hz, 1H), 7.50 (td,  $J = 7.8, 1.2$  Hz, 1H), 7.54 (d,  $J = 7.8$  Hz, 1H), 7.64 (s, 1H), 8.45 (d,  $J = 4.7$  Hz, 1H), 11.62 (s, 1H);  $^{13}\text{C}$  NMR (150 MHz,  $\text{CDCl}_3$ )  $\delta$  19.8, 111.6, 120.0, 122.2, 125.5, 126.9, 130.9, 132.7, 136.2, 137.0, 149.1, 149.4, 151.6, 155.2, 159.2, 167.5; HRMS (ESI+) calcd for  $\text{C}_{16}\text{H}_{14}\text{N}_3\text{OS}$   $[\text{M} + \text{H}]^+$  296.0852, found 296.0845 (error 2.4 ppm).

#### **2-[*N*-(3-Methylbenzoyl)amino]-4-(pyridin-2-yl)thiazole (37)**

Synthesized from 58 mg *meta*-toluic acid using general procedure C to obtain 83 mg (80%) of a slightly yellowish powder.  $R_f$  0.63 (DCM:MeOH = 9:1);  $^1\text{H}$  NMR (600 MHz,  $\text{CDCl}_3$ )  $\delta$  2.36 (s, 3H), 7.16 (ddd,  $J = 7.6, 4.7, 1.2$  Hz, 1H), 7.31 (m, 1H), 7.32 (s, 1H), 7.66 (m, 3H), 7.74 (s, 1H), 7.82 (d,  $J = 7.6$  Hz, 1H), 8.59 (d,  $J = 4.1$  Hz, 1H), 10.32 (s, 1H);  $^{13}\text{C}$  NMR (150 MHz,  $\text{CDCl}_3$ )  $\delta$  21.1, 112.0, 120.2, 122.3, 124.5, 127.9, 128.5, 131.8, 133.4, 136.4, 138.5, 149.3, 149.7, 151.8, 159.3, 165.7. HRMS (ESI+) calcd for  $\text{C}_{16}\text{H}_{14}\text{N}_3\text{OS}$   $[\text{M} + \text{H}]^+$  296.0852, found 296.0844 (error 2.7 ppm).

#### **2-[*N*-(4-Methylbenzoyl)amino]-4-(pyridin-2-yl)thiazole (38)**

Synthesized from 66 mg *para*-toluic acid using general procedure C to obtain 94 mg (91%) of a slightly yellowish crystalline solid.  $R_f$  0.60 (DCM:MeOH = 9:1);  $^1\text{H}$  NMR (600 MHz,  $\text{CDCl}_3$ )  $\delta$  2.28 (s, 3H), 7.06 (m, 1H), 7.09 (d,  $J = 7.6$  Hz, 2H), 7.53 (t,  $J = 7.3$  Hz, 1H), 7.69-7.73 (m, 4H), 8.51 (d,  $J = 3.0$  Hz, 1H), 11.07 (s, 1H);  $^{13}\text{C}$  NMR (150 MHz,  $\text{CDCl}_3$ )  $\delta$  21.3, 111.9, 120.2, 122.3, 127.4, 129.0, 129.2, 136.5, 143.3, 149.2, 149.6, 152.1, 159.0, 165.2; HRMS (ESI+) calcd for  $\text{C}_{16}\text{H}_{14}\text{N}_3\text{OS}$   $[\text{M} + \text{H}]^+$  296.0852, found 296.0855 (error 1.0 ppm).

#### **2-[*N*-(2-Benzyloxybenzoyl)amino]-4-(pyridin-2-yl)thiazole (39)**

Synthesized from 113 mg 2-benzyloxybenzoic acid using general procedure C to obtain 105 mg (77%) of a slightly yellowish powder.  $R_f$  0.68 (DCM:MeOH = 9:1);  $^1\text{H}$  NMR (600 MHz,  $\text{CDCl}_3$ )  $\delta$  5.38 (s, 2H), 7.14 (d,  $J = 8.2$  Hz, 1H), 7.18 (t,  $J = 7.3$  Hz, 1H), 7.24 (m, 1H), 7.45 (m, 1H), 7.49 (t,  $J = 7.2$  Hz, 2H), 7.55 (t,  $J = 8.2$  Hz, 1H), 7.58 (d,  $J = 7.6$  Hz, 2H), 7.79 (td,  $J = 6.9, 1.8$  Hz, 1H), 7.85 (m, 1H), 7.92 (d,  $J = 7.6$  Hz, 1H), 8.35 (d,  $J = 7.0$  Hz, 1H), 8.62 (d,  $J = 4.1$  Hz, 1H), 11.35 (s, 1H);  $^{13}\text{C}$  NMR (150 MHz, DMSO)  $\delta$  70.5, 111.9, 113.7, 120.1, 121.1, 121.4,



122.9, 127.9, 128.1, 128.5, 130.5, 133.6, 136.2, 137.2, 149.2, 149.5, 151.9, 156.4, 157.5, 163.8; HRMS (APCI+) calcd for C<sub>22</sub>H<sub>18</sub>N<sub>3</sub>O<sub>2</sub>S [M + H]<sup>+</sup> 388.1114, found 388.1110 (error 1.0 ppm).

#### **2-[N-(3-Benzyloxybenzoyl)amino]-4-(pyridin-2-yl)thiazole (40)**

Synthesized from 113 mg 3-benzyloxybenzoic acid using general procedure C to obtain 44 mg (32%) of a colorless crystalline solid. *R<sub>f</sub>* 0.47 (DCM:MeOH = 9:1); <sup>1</sup>H NMR (600 MHz, CDCl<sub>3</sub>) δ 5.00 (s, 2H), 7.04 (d, *J* = 7.6 Hz, 1H), 7.09 (dd, *J* = 6.0, 5.4 Hz, 1H), 7.22 (t, *J* = 7.9 Hz, 1H), 7.32 (m, 1H), 7.37-7.41 (m, 5H), 7.48 (s, 1H), 7.57 (t, *J* = 7.6 Hz, 1H), 7.72 (s, 1H), 7.73 (d, *J* = 7.8 Hz, 1H), 8.53 (d, *J* = 4.1 Hz, 1H), 11.02 (s, 1H); <sup>13</sup>C NMR (150 MHz, CDCl<sub>3</sub>) δ 70.0, 112.2, 113.3, 119.6, 119.9, 120.3, 122.5, 127.4, 128.1, 128.5, 129.8, 133.3, 136.2, 136.6, 149.3, 149.7, 151.9, 158.9, 159.0, 165.1; HRMS (ESI+) calcd for C<sub>22</sub>H<sub>18</sub>N<sub>3</sub>O<sub>2</sub>S [M + H]<sup>+</sup> 388.1114, found 388.1123 (error 2.3 ppm).

#### **2-[N-(4-Benzyloxybenzoyl)amino]-4-(pyridin-2-yl)thiazole (41)**

Synthesized from 113 mg 4-benzyloxybenzoic acid using general procedure C to obtain 103 mg (76%) of a colorless crystalline solid. *R<sub>f</sub>* 0.42 (DCM:MeOH = 9:1); <sup>1</sup>H NMR (600 MHz, CDCl<sub>3</sub>) δ 5.14 (s, 2H), 7.08 (d, *J* = 8.8 Hz, 2H), 7.27 (dd, *J* = 7.3, 5.0 Hz, 1H), 7.34 (m, 1H), 7.39 (t, *J* = 7.6 Hz, 2H), 7.43 (d, *J* = 7.8 Hz, 2H), 7.64 (s, 1H), 7.80 (t, *J* = 7.6 Hz, 1H), 7.92 (d, *J* = 7.6 Hz, 1H), 8.03 (d, *J* = 8.8 Hz, 2H), 8.58 (d, *J* = 4.7 Hz, 1H); <sup>13</sup>C NMR (150 MHz, CDCl<sub>3</sub>) δ 69.9, 112.1, 114.6, 120.8, 122.6, 124.2, 127.2, 127.9, 128.3, 129.6, 135.9, 137.4, 148.4, 148.5, 151.7, 159.1, 162.2, 165.0; HRMS (ESI+) calcd for C<sub>22</sub>H<sub>18</sub>N<sub>3</sub>O<sub>2</sub>S [M + H]<sup>+</sup> 388.1114, found 388.1116 (error 0.5 ppm).

#### **2-[N-(2-Methoxybenzoyl)amino]-4-(pyridin-2-yl)thiazole (42)**

Synthesized from 64 mg 2-methoxybenzoic acid using general procedure C to obtain 47 mg (43%) of an off-white solid. *R<sub>f</sub>* 0.61 (DCM:MeOH = 9:1); <sup>1</sup>H NMR (600 MHz, CDCl<sub>3</sub>) δ 4.08 (s, 3H), 7.03 (d, *J* = 8.2 Hz, 1H), 7.12 (t, *J* = 7.6 Hz, 1H), 7.19 (dd, *J* = 7.0, 4.7 Hz, 1H), 7.52 (td, *J* = 7.8, 1.8 Hz, 1H), 7.71 (s, 1H), 7.73 (td, *J* = 7.6, 1.8 Hz, 1H), 7.98 (d, *J* = 8.2 Hz, 1H), 8.29 (dd, *J* = 7.6, 1.8 Hz, 1H), 8.62 (d, *J* = 4.7 Hz, 1H), 11.15 (s, 1H); <sup>13</sup>C NMR (150 MHz, CDCl<sub>3</sub>) δ 56.3, 111.5, 112.2, 118.9, 120.7, 121.6, 122.5, 132.6, 134.4, 136.9, 149.3, 149.7, 152.4, 157.7, 158.0, 162.7; HRMS (ESI+) calcd for C<sub>16</sub>H<sub>14</sub>N<sub>3</sub>O<sub>2</sub>S [M + H]<sup>+</sup> 312.0801, found 312.0794 (error 2.2 ppm).

#### **2-[N-(3-Methoxybenzoyl)amino]-4-(pyridin-2-yl)thiazole (43)**

Synthesized from 62 mg 3-methoxybenzoic acid using general procedure C to obtain 76 mg (70%) of a yellowish solid. *R<sub>f</sub>* 0.62 (DCM:MeOH = 9:1); <sup>1</sup>H NMR (600 MHz, CDCl<sub>3</sub>) δ 3.72 (s, 3H), 6.93 (dd, *J* = 8.2, 2.3 Hz, 1H), 7.07 (dd, *J* = 7.0, 5.3 Hz, 1H), 7.16 (t, *J* = 7.9 Hz, 1H), 7.33 (d, *J* = 7.6 Hz, 1H), 7.36 (s, 1H), 7.54 (td, *J* = 7.8, 1.5 Hz, 1H), 7.68 (d, *J* = 8.4 Hz, 1H), 7.70 (s, 1H), 8.50 (d, *J* = 4.7 Hz, 1H), 11.14 (s, 1H); <sup>13</sup>C NMR (150 MHz, CDCl<sub>3</sub>) δ 55.2, 112.0, 112.2, 119.1, 119.3, 120.2, 122.3, 129.6, 133.2, 136.4, 149.2, 149.6, 151.8, 159.1, 159.5, 165.3; HRMS (ESI+) calcd for C<sub>16</sub>H<sub>14</sub>N<sub>3</sub>O<sub>2</sub>S [M + H]<sup>+</sup> 312.0801, found 312.0798 (error 1.0 ppm).

#### **2-[N-(4-Methoxybenzoyl)amino]-4-(pyridin-2-yl)thiazole (44)**

Synthesized from 65 mg 4-methoxybenzoic acid using general procedure C to obtain 84 mg (77%) of a colorless powder. *R<sub>f</sub>* 0.57 (DCM:MeOH = 9:1); <sup>1</sup>H NMR (600 MHz, CDCl<sub>3</sub>) δ 3.72 (s, 3H), 6.74 (d, *J* = 8.8 Hz, 2H), 7.04 (dd, *J* = 7.0, 5.3 Hz, 1H), 7.51 (td, *J* = 7.6, 1.8 Hz, 1H),

7.66 (s, 1H), 7.70 (d,  $J = 7.6$  Hz, 1H), 7.81 (d,  $J = 8.8$  Hz, 2H), 8.47 (d,  $J = 4.1$  Hz, 1H), 11.19 (s, 1H);  $^{13}\text{C}$  NMR (150 MHz,  $\text{CDCl}_3$ )  $\delta$  55.2, 111.7, 113.7, 120.2, 122.2, 124.0, 129.4, 136.4, 149.1, 149.5, 152.1, 159.2, 162.9, 164.8; HRMS (ESI+) calcd for  $\text{C}_{16}\text{H}_{14}\text{N}_3\text{O}_2\text{S}$   $[\text{M} + \text{H}]^+$  312.0801, found 312.0805 (error 1.3 ppm).

#### **2-[N-(2-Hydroxybenzoyl)amino]-4-(pyridin-2-yl)thiazole (45)**

Synthesized from 69 mg salicylic acid using general procedure C to obtain 40 mg (38%) of a colorless solid.  $R_f$  0.48 (DCM:MeOH = 9:1);  $^1\text{H}$  NMR (600 MHz,  $\text{CD}_3\text{OD}$ )  $\delta$  7.00 (t,  $J = 7.3$  Hz, 1H), 7.06 (d,  $J = 8.2$  Hz, 1H), 7.34 (dd,  $J = 6.6, 5.4$  Hz, 1H), 7.48 (t,  $J = 7.6$  Hz, 1H), 7.88 (t,  $J = 7.8$  Hz, 1H), 7.90 (s, 1H), 8.02 (t,  $J = 7.6$  Hz, 2H), 8.61 (d,  $J = 8.2$  Hz, 1H), 12.19 (s, 1H);  $^{13}\text{C}$  NMR (150 MHz,  $\text{CDCl}_3$ )  $\delta$  112.2, 116.7, 117.2, 119.6, 120.2, 123.0, 130.3, 134.4, 137.3, 148.8, 149.5, 151.7, 157.6, 158.2, 164.7; HRMS (APCI+) calcd for  $\text{C}_{15}\text{H}_{12}\text{N}_3\text{O}_2\text{S}$   $[\text{M} + \text{H}]^+$  298.0645, found 298.0638 (error 2.3 ppm).

#### **2-[N-(2-Acetylbenzoyl)amino]-4-(pyridin-2-yl)thiazole (46)**

Synthesized from 64 mg 2-acetylbenzoic acid using general procedure C to obtain 39 mg (31%) of a yellowish solid.  $R_f$  0.69 (DCM:MeOH = 9:1);  $^1\text{H}$  NMR (600 MHz,  $\text{CDCl}_3$ )  $\delta$  2.22 (s, 3H), 6.20 (s, 1H), 7.23 (dd,  $J = 6.0, 5.4$  Hz, 1H), 7.59 (td,  $J = 6.9, 2.4$  Hz, 1H), 7.71-7.74 (m, 2H), 7.76 (t,  $J = 7.6$  Hz, 1H), 7.82 (s, 1H), 7.92 (d,  $J = 7.0$  Hz, 1H), 7.97 (d,  $J = 7.6$  Hz, 1H), 8.57 (d,  $J = 4.7$  Hz, 1H);  $^{13}\text{C}$  NMR (150 MHz,  $\text{CDCl}_3$ )  $\delta$  26.7, 91.8, 111.9, 120.6, 122.3, 122.7, 122.9, 124.3, 128.6, 130.0, 134.1, 137.2, 147.6, 149.0, 151.8, 156.6, 164.8; HRMS (ESI+) calcd for  $\text{C}_{17}\text{H}_{14}\text{N}_3\text{O}_2\text{S}$   $[\text{M} + \text{H}]^+$  324.0801, found 324.0807 (error 1.9 ppm).

#### **2-[N-(3-Acetylbenzoyl)amino]-4-(pyridin-2-yl)thiazole (47)**

Synthesized from 64 mg 3-acetylbenzoic acid using general procedure C to obtain 70 mg (62%) of a colorless powder.  $R_f$  0.65 (DCM:MeOH = 9:1);  $^1\text{H}$  NMR (600 MHz,  $\text{CDCl}_3$ )  $\delta$  2.59 (s, 3H), 7.11 (dd,  $J = 7.2, 4.8$  Hz, 1H), 7.49 (t,  $J = 7.6$  Hz, 1H), 7.60 (t,  $J = 7.6$  Hz, 1H), 7.72 (s, 1H), 7.74 (d,  $J = 7.6$  Hz, 1H), 8.05 (d,  $J = 8.8$  Hz, 1H), 8.07 (d,  $J = 8.8$  Hz, 1H), 8.43 (s, 1H), 8.52 (d,  $J = 4.1$  Hz, 1H), 11.02 (s, 1H);  $^{13}\text{C}$  NMR (150 MHz,  $\text{CDCl}_3$ )  $\delta$  26.6, 112.4, 120.4, 122.6, 127.2, 129.3, 131.8, 132.2, 132.6, 136.6, 137.4, 149.5, 149.7, 151.9, 158.8, 164.5, 196.7; HRMS (ESI+) calcd for  $\text{C}_{17}\text{H}_{14}\text{N}_3\text{O}_2\text{S}$   $[\text{M} + \text{H}]^+$  324.0801, found 324.0800 (error 0.3 ppm).

#### **2-[N-(4-Acetylbenzoyl)amino]-4-(pyridin-2-yl)thiazole (48)**

Synthesized from 67 mg 4-acetylbenzoic acid using general procedure C to obtain 67 mg (59%) of a colorless powder.  $R_f$  0.59 (DCM:MeOH = 9:1);  $^1\text{H}$  NMR (600 MHz,  $\text{CDCl}_3$ )  $\delta$  2.64 (s, 3H), 7.18 (dd,  $J = 7.2, 4.8$  Hz, 1H), 7.68 (td,  $J = 7.8, 1.5$  Hz, 1H), 7.75 (s, 1H), 7.83 (d,  $J = 7.6$  Hz, 1H), 7.98 (d,  $J = 8.4$  Hz, 2H), 8.01 (d,  $J = 8.4$  Hz, 2H), 8.59 (d,  $J = 4.7$  Hz, 1H), 10.30 (s, 1H);  $^{13}\text{C}$  NMR (150 MHz,  $\text{CDCl}_3$ )  $\delta$  26.8, 112.4, 120.4, 122.7, 127.7, 128.8, 135.6, 136.8, 140.1, 149.6, 152.0, 158.3, 164.0, 172.1, 197.0; HRMS (ESI+) calcd for  $\text{C}_{17}\text{H}_{14}\text{N}_3\text{O}_2\text{S}$   $[\text{M} + \text{H}]^+$  324.0801, found 324.0795 (error 1.9 ppm).

#### **2-[N-(2-Nitrobenzoyl)amino]-4-(pyridin-2-yl)thiazole (49)**

Synthesized from 262 mg 2-nitrobenzoic acid using general procedure C to obtain 175 mg (38%) of a yellow powder.  $R_f$  0.69 (DCM:MeOH = 9:1);  $^1\text{H}$  NMR (600 MHz,  $\text{CDCl}_3$ )  $\delta$  7.13 (ddd,  $J = 7.2, 4.8, 1.2$  Hz, 1H), 7.34-7.38 (m, 3H), 7.56 (td,  $J = 7.8, 1.5$  Hz, 1H), 7.61 (d,  $J = 7.8$  Hz, 1H), 7.67 (s, 1H), 7.74 (dd,  $J = 6.6, 2.3$  Hz, 1H), 8.48 (d,  $J = 4.7$  Hz, 1H), 12.00 (s, 1H);

$^{13}\text{C}$  NMR (150 MHz,  $\text{CDCl}_3$ )  $\delta$  112.4, 120.1, 122.7, 124.2, 128.4, 130.0, 131.2, 133.4, 136.7, 146.0, 148.8, 149.3, 151.0, 159.9, 164.5; HRMS (ESI+) calcd for  $\text{C}_{15}\text{H}_{11}\text{N}_4\text{O}_3\text{S}$  [ $\text{M} + \text{H}$ ] $^+$  327.0546, found 327.0542 (error 1.2 ppm).

#### **2-[N-(3-Nitrobenzoyl)amino]-4-(pyridin-2-yl)thiazole (50)**

Synthesized from 133 mg 3-nitrobenzoic acid using general procedure C to obtain 46 mg (20%) of an orange solid.  $R_f$  0.55 (DCM:MeOH = 9:1);  $^1\text{H}$  NMR (600 MHz,  $\text{CDCl}_3$ )  $\delta$  7.06 (dd,  $J = 6.7$ , 5.6 Hz, 1H), 7.47 (t,  $J = 7.9$  Hz, 1H), 7.56 (td,  $J = 7.6$ , 1.8 Hz, 1H), 7.66 (d,  $J = 8.2$  Hz, 1H), 7.67 (s, 1H), 8.17 (d,  $J = 7.6$  Hz, 1H), 8.19 (d,  $J = 7.6$  Hz, 1H), 8.45 (d,  $J = 4.7$  Hz, 1H), 8.87 (s, 1H), 12.41 (s, 1H);  $^{13}\text{C}$  NMR (150 MHz,  $\text{CDCl}_3$ )  $\delta$  112.5, 120.3, 122.6, 122.8, 126.7, 129.6, 133.6, 134.0, 136.6, 147.8, 149.3, 149.4, 151.2, 159.6, 163.9; HRMS (APCI+) calcd for  $\text{C}_{15}\text{H}_{11}\text{N}_4\text{O}_3\text{S}$  [ $\text{M} + \text{H}$ ] $^+$  327.0546, found 327.0544 (error 0.6 ppm).

#### **2-[N-(2-Bromobenzoyl)amino]-4-(pyridin-2-yl)thiazole (51)**

Synthesized from 85 mg 2-bromobenzoic acid using general procedure C to obtain 42 mg (28%) of a slightly yellowish solid.  $R_f$  0.60 (DCM:MeOH = 9:1);  $^1\text{H}$  NMR (600 MHz,  $\text{CDCl}_3$ )  $\delta$  7.14 (dd,  $J = 7.0$ , 4.7 Hz, 1H), 7.24-7.27 (m, 1H), 7.28-7.30 (m, 1H), 7.54 (d,  $J = 7.6$  Hz, 1H), 7.56-7.58 (m, 1H), 7.69 (td,  $J = 7.6$ , 1.2 Hz, 1H), 7.74 (s, 1H), 7.81 (d,  $J = 7.6$  Hz, 1H), 8.57 (d,  $J = 4.7$  Hz, 1H), 10.59 (s, 1H);  $^{13}\text{C}$  NMR (150 MHz,  $\text{CDCl}_3$ )  $\delta$  112.4, 119.6, 120.3, 122.5, 127.2, 129.4, 132.1, 133.4, 134.8, 136.9, 149.0, 149.2, 151.3, 159.2, 165.4; HRMS (ESI+) calcd for  $\text{C}_{15}\text{H}_{11}\text{BrN}_3\text{OS}$  [ $\text{M} + \text{H}$ ] $^+$  359.9801, found 359.9803 (error 0.6 ppm).

#### **2-[N-(3-Bromobenzoyl)amino]-4-(pyridin-2-yl)thiazole (52)**

Synthesized from 85 mg 3-bromobenzoic acid using general procedure C to obtain 120 mg (95%) of a colorless solid.  $R_f$  0.55 (DCM:MeOH = 9:1);  $^1\text{H}$  NMR (600 MHz,  $\text{CDCl}_3$ )  $\delta$  7.06 (dd,  $J = 7.2$ , 5.4 Hz, 1H), 7.09 (t,  $J = 7.8$ , 1H), 7.45 (d,  $J = 8.2$  Hz, 1H), 7.53 (td,  $J = 7.6$ , 1.2 Hz, 1H), 7.66 (d,  $J = 8.2$  Hz, 1H), 7.69 (s, 1H), 7.70 (d,  $J = 8.2$  Hz, 1H), 7.93 (s, 1H), 8.46 (d,  $J = 4.1$  Hz, 1H), 11.94 (s, 1H);  $^{13}\text{C}$  NMR (150 MHz,  $\text{CDCl}_3$ )  $\delta$  112.2, 120.2, 122.4, 122.6, 126.0, 129.9, 130.8, 134.1, 135.2, 136.4, 149.2, 149.5, 151.8, 159.2, 164.4; HRMS (ESI+) calcd for  $\text{C}_{15}\text{H}_{11}\text{BrN}_3\text{OS}$  [ $\text{M} + \text{H}$ ] $^+$  359.9801, found 359.9807 (error 1.7 ppm).

#### **2-[N-(4-Bromobenzoyl)amino]-4-(pyridin-2-yl)thiazole (53)**

Synthesized from 82 mg 4-bromobenzoic acid using general procedure C to obtain 106 mg (83%) of a colorless solid.  $R_f$  0.56 (DCM:MeOH = 9:1);  $^1\text{H}$  NMR (600 MHz,  $\text{CDCl}_3$ )  $\delta$  7.11 (dd,  $J = 6.5$ , 4.7 Hz, 1H), 7.44 (d,  $J = 8.8$  Hz, 2H), 7.57 (td,  $J = 7.6$ , 1.8 Hz, 1H), 7.65 (d,  $J = 8.8$  Hz, 2H), 7.70 (d,  $J = 8.2$  Hz, 1H), 7.73 (s, 1H), 8.55 (d,  $J = 4.1$  Hz, 1H), 11.13 (s, 1H);  $^{13}\text{C}$  NMR (150 MHz,  $\text{CDCl}_3$ )  $\delta$  112.3, 120.3, 122.6, 127.7, 128.9, 130.8, 132.0, 136.6, 149.5, 149.8, 151.9, 159.2, 164.6; HRMS (ESI+) calcd for  $\text{C}_{15}\text{H}_{11}\text{BrN}_3\text{OS}$  [ $\text{M} + \text{H}$ ] $^+$  359.9801, found 359.9801 (error 0.0 ppm).

#### **2-[N-(2-Chlorobenzoyl)amino]-4-(pyridin-2-yl)thiazole (54)**

Synthesized from 57 mg 2-chlorobenzoic acid using general procedure C to obtain 80 mg (71%) of a colorless crystalline solid.  $R_f$  0.62 (DCM:MeOH = 9:1);  $^1\text{H}$  NMR (600 MHz,  $\text{CDCl}_3$ )  $\delta$  7.05-7.08 (m, 1H), 7.13 (t,  $J = 6.3$  Hz, 1H), 7.17-7.20 (m, 2H), 7.45 (d,  $J = 7.6$  Hz, 1H), 7.62 (t,  $J = 7.5$  Hz, 1H), 7.66 (d,  $J = 8.4$  Hz, 1H), 7.72 (s, 1H), 8.50 (d,  $J = 4.7$  Hz, 1H), 11.67 (s, 1H);  $^{13}\text{C}$  NMR (150 MHz,  $\text{CDCl}_3$ )  $\delta$  112.3, 120.3, 122.5, 126.8, 129.9, 130.3, 131.1, 132.2, 132.4, 136.8,

149.1, 149.3, 151.4, 158.9, 164.4; HRMS (ESI+) calcd for C<sub>15</sub>H<sub>11</sub>ClN<sub>3</sub>OS [M + H]<sup>+</sup> 316.0306, found 316.0306 (error 0.0 ppm).

### 2-[N-(3-Chlorobenzoyl)amino]-4-(pyridin-2-yl)thiazole (55)

Synthesized from 65 mg 3-chlorobenzoic acid using general procedure C to obtain 96 mg (88%) of a slightly yellowish solid. *R<sub>f</sub>* 0.61 (DCM:MeOH = 9:1); <sup>1</sup>H NMR (600 MHz, CDCl<sub>3</sub>) δ 7.16 (dd, *J* = 7.0, 5.3 Hz, 1H), 7.32 (t, *J* = 7.9 Hz, 1H), 7.45 (dd, *J* = 7.6, 1.2 Hz, 1H), 7.64 (td, *J* = 7.6, 1.8 Hz, 1H), 7.71 (d, *J* = 7.6 Hz, 1H), 7.74 (s, 1H), 7.77 (d, *J* = 8.2 Hz, 1H), 7.85 (s, 1H), 8.55 (d, *J* = 4.7 Hz, 1H), 10.78 (s, 1H); <sup>13</sup>C NMR (150 MHz, CDCl<sub>3</sub>) δ 112.4, 120.4, 122.6, 125.3, 127.9, 130.1, 132.8, 133.8, 135.1, 136.7, 149.5, 149.7, 151.9, 158.7, 164.0; HRMS (ESI+) calcd for C<sub>15</sub>H<sub>11</sub>ClN<sub>3</sub>OS [M + H]<sup>+</sup> 316.0306, found 316.0306 (error 0.0 ppm).

### 2-[N-(4-Chlorobenzoyl)amino]-4-(pyridin-2-yl)thiazole (56)

Synthesized from 50 mg 4-chlorophenylcarboxylic acid using general procedure C to obtain 55 mg (51%) of a pale yellow powder. *R<sub>f</sub>* 0.48 (DCM:MeOH 9:1); <sup>1</sup>H NMR (600 MHz, CDCl<sub>3</sub>) δ 7.09 (dd, *J* = 6.6, 5.4 Hz, 1H), 7.25 (d, *J* = 8.4 Hz, 2H), 7.56 (t, *J* = 7.5 Hz, 1H), 6.68 (m, 1H), 7.70 (s, 1H), 7.72 (d, *J* = 6.0 Hz, 2H), 8.53 (d, *J* = 4.2 Hz, 1H), 11.24 (s, 1H); <sup>13</sup>C NMR (150 MHz, CDCl<sub>3</sub>) δ 112.3, 120.3, 122.6, 128.8, 129.0, 130.3, 136.6, 139.1, 149.4, 149.8, 151.8, 159.3, 164.5; HRMS (ESI+) calcd for C<sub>15</sub>H<sub>11</sub>ClN<sub>3</sub>OS [M + H]<sup>+</sup> 316.0306, found 316.0301 (error 1.6 ppm).

### 2-[N-(2-Fluorobenzoyl)amino]-4-(pyridin-2-yl)thiazole (57)

Synthesized from 50 mg 2-fluorophenylcarboxylic acid using general procedure C to obtain 58 mg (58%) of a pale yellow powder. *R<sub>f</sub>* 0.54 (DCM:MeOH 9:1); <sup>1</sup>H NMR (600 MHz, CDCl<sub>3</sub>) δ 7.22 (m, 2H), 7.35 (t, *J* = 7.2 Hz, 1H), 7.59 (d, *J* = 6.0 Hz, 1H), 7.73 (s, 1H), 7.75 (d, *J* = 7.8 Hz, 1H), 7.96 (d, *J* = 7.2 Hz, 1H), 8.23 (t, *J* = 7.5 Hz, 1H), 8.62-8.64 (m, 1H), 10.02 (s, 1H); <sup>13</sup>C NMR (150 MHz, CDCl<sub>3</sub>) δ 112.4, 116.5 (d, *J* = 24.2 Hz), 118.8 (d, *J* = 10.5 Hz), 120.7, 122.7, 125.4 (d, *J* = 3.3 Hz), 132.4 (d, *J* = 0.9 Hz), 135.1 (d, *J* = 9.5 Hz), 136.9, 149.6, 150.1, 152.4, 157.4, 160.6 (d, *J* = 2.9 Hz), 160.8 (d, *J* = 248 Hz); HRMS (ESI+) calcd for C<sub>15</sub>H<sub>11</sub>FN<sub>3</sub>OS [M + H]<sup>+</sup> 300.0601, found 300.0605 (error 1.3 ppm).

### 2-[N-(3-Fluorobenzoyl)amino]-4-(pyridin-2-yl)thiazole (58)

Synthesized from 59 mg 3-fluorobenzoic acid using general procedure C to obtain 48 mg (46%) of a slightly yellowish solid. *R<sub>f</sub>* 0.61 (DCM:MeOH = 9:1); <sup>1</sup>H NMR (600 MHz, CDCl<sub>3</sub>) δ 7.06 (m, 2H), 7.21 (dt, *J* = 7.8, 5.4 Hz, 1H), 7.49 (m, 2H), 7.53 (dt, *J* = 7.6, 1.8 Hz, 1H), 7.66 (d, *J* = 7.6 Hz, 1H), 7.68 (s, 1H), 8.46 (d, *J* = 4.1 Hz, 1H), 11.22 (s, 1H); <sup>13</sup>C NMR (150 MHz, CDCl<sub>3</sub>) δ 112.3, 114.9 (d, *J* = 23 Hz), 119.7 (d, *J* = 21 Hz), 120.3, 122.5, 122.8 (d, *J* = 3.5 Hz), 130.4 (d, *J* = 8 Hz), 134.2 (d, *J* = 7 Hz), 136.6, 149.4, 149.7, 151.8, 159.0, 162.5 (d, *J* = 247 Hz), 164.2; HRMS (ESI+) calcd for C<sub>15</sub>H<sub>11</sub>FN<sub>3</sub>OS [M + H]<sup>+</sup> 300.0601, found 300.0602 (error 0.3 ppm).

### 2-[N-(4-Fluorobenzoyl)amino]-4-(pyridin-2-yl)thiazole (59)

Synthesized from 62 mg 4-fluorobenzoic acid using general procedure C to obtain 65 mg (62%) of a colorless crystalline solid. *R<sub>f</sub>* 0.59 (DCM:MeOH = 9:1); <sup>1</sup>H NMR (600 MHz, CDCl<sub>3</sub>) δ 6.94 (t, *J* = 8.5 Hz, 2H), 7.06 (dd, *J* = 6.7, 5.0 Hz, 1H), 7.53 (td, *J* = 7.6, 1.2 Hz, 1H), 7.69 (s, 1H), 7.69 (d, *J* = 7.2 Hz, 1H), 7.86 (dd, *J* = 8.8, 5.3 Hz, 2H), 8.48 (d, *J* = 4.7 Hz, 1H), 11.57 (s, 1H); <sup>13</sup>C NMR (150 MHz, CDCl<sub>3</sub>) δ 112.0, 115.7 (d, *J* = 22 Hz), 120.2, 122.4, 128.2 (d, *J* = 3.5 Hz),

130.1 (d,  $J = 9.2$  Hz), 136.5, 149.3, 149.6, 152.0, 159.2, 164.5, 165.1 (d,  $J = 253$  Hz); HRMS (ESI+) calcd for  $C_{15}H_{11}FN_3OS$   $[M + H]^+$  300.0601, found 300.0608 (error 2.3 ppm).

#### **2-[N-(2,3-Difluorobenzoyl)amino]-4-(pyridin-2-yl)thiazole (60)**

Synthesized from 77 mg 2,3-difluorobenzoic acid using general procedure C to obtain 67 mg (60%) of a colorless crystalline solid.  $R_f$  0.63 (DCM:MeOH = 9:1);  $^1H$  NMR (600 MHz,  $CDCl_3$ )  $\delta$  7.25 (m, 1H), 7.30 (td,  $J = 7.8, 4.8$  Hz, 1H), 7.44 (dt,  $J = 9.0, 8.4$  Hz, 1H), 7.79 (t,  $J = 7.6$  Hz, 1H), 7.82 (s, 1H), 7.98 (m, 1H), 7.99 (t,  $J = 7.9$  Hz, 1H), 8.65 (d,  $J = 4.7$  Hz, 1H), 9.91 (s, 1H);  $^{13}C$  NMR (150 MHz,  $CDCl_3$ )  $\delta$  112.6, 120.6, 121.4 (d,  $J = 8.0$  Hz), 121.6 (d,  $J = 17.3$  Hz), 122.7, 124.9 (t,  $J = 5.8$  Hz), 126.3 (d,  $J = 3.5$  Hz), 136.9, 148.9 (dd,  $J = 250, 14.4$  Hz), 149.3, 149.8, 150.5 (dd,  $J = 250, 14.4$  Hz), 151.9, 157.4, 159.9; HRMS (ESI+) calcd for  $C_{15}H_{10}F_2N_3OS$   $[M + H]^+$  318.0507, found 318.0505 (error 0.6 ppm).

#### **2-[N-(2,4-Difluorobenzoyl)amino]-4-(pyridin-2-yl)thiazole (61)**

Synthesized from 77 mg 2,4-difluorobenzoic acid using general procedure C to obtain 66 mg (59%) of a colorless powder.  $R_f$  0.64 (DCM:MeOH = 9:1);  $^1H$  NMR (600 MHz,  $CDCl_3$ )  $\delta$  6.96 (ddd,  $J = 12.0, 8.4, 2.4$  Hz, 1H), 7.07 (td,  $J = 8.1, 1.8$  Hz, 1H), 7.21 (ddd,  $J = 7.2, 4.8, 1.2$  Hz, 1H), 7.73 (s, 1H), 7.74 (td,  $J = 7.6, 1.8$  Hz, 1H), 7.94 (d,  $J = 7.6$  Hz, 1H), 8.24 (td,  $J = 8.8, 6.5$  Hz, 1H), 8.62 (d,  $J = 4.7$  Hz, 1H), 9.99 (s, 1H);  $^{13}C$  NMR (150 MHz,  $CDCl_3$ )  $\delta$  104.8 (dd,  $J = 28, 26$  Hz), 112.4, 113.1 (dd,  $J = 21, 3.5$  Hz), 115.4 (dd,  $J = 11, 3.5$  Hz), 120.7, 122.7, 134.2 (dd,  $J = 10, 3.5$  Hz), 136.9, 149.6, 150.1, 152.3, 157.3, 159.7 (d,  $J = 3.5$  Hz), 161.2 (dd,  $J = 251, 13$  Hz), 165.8 (dd,  $J = 257, 13$  Hz). HRMS (ESI+) calcd for  $C_{15}H_{10}F_2N_3OS$   $[M + H]^+$  318.0507, found 318.0507 (error 0.0 ppm).

#### **2-[N-(2,5-Difluorobenzoyl)amino]-4-(pyridin-2-yl)thiazole (62)**

Synthesized from 77 mg 2,5-difluorobenzoic acid using general procedure C to obtain 77 mg (69%) of a colorless powder.  $R_f$  0.60 (DCM:MeOH = 9:1);  $^1H$  NMR (600 MHz,  $CDCl_3$ )  $\delta$  7.14 (td,  $J = 9.9, 4.2$  Hz, 1H), 7.17-7.22 (m, 2H), 7.70 (t,  $J = 7.6$  Hz, 1H), 7.74 (s, 1H), 7.81 (ddd,  $J = 8.4, 5.4, 3.2$  Hz, 1H), 7.90 (d,  $J = 8.2$  Hz, 1H), 8.59 (d,  $J = 4.7$  Hz, 1H), 10.20 (s, 1H);  $^{13}C$  NMR (150 MHz,  $CDCl_3$ )  $\delta$  112.6, 117.9 (dd,  $J = 27.6, 8.1$  Hz), 118.1 (dd,  $J = 16.6, 2.3$  Hz), 120.3 (dd,  $J = 13.8, 8.1$  Hz), 120.6, 121.5 (dd,  $J = 24.2, 10.4$  Hz), 122.6, 136.9, 149.3, 149.9, 152.0, 156.4 (dd,  $J = 244, 2.3$  Hz), 157.2, 158.8 (dd,  $J = 244, 2.3$  Hz), 159.5 (d,  $J = 3.5$  Hz); HRMS (ESI+) calcd for  $C_{15}H_{10}F_2N_3OS$   $[M + H]^+$  318.0507, found 318.0513 (error 1.9 ppm).

#### **2-[N-(2,6-Difluorobenzoyl)amino]-4-(pyridin-2-yl)thiazole (63)**

Synthesized from 77 mg 2,6-difluorobenzoic acid using general procedure C to obtain 66 mg (59%) of a colorless powder.  $R_f$  0.57 (DCM:MeOH = 9:1);  $^1H$  NMR (600 MHz,  $CDCl_3$ )  $\delta$  6.60 (t,  $J = 8.8$  Hz, 2H), 7.12 (m, 2H), 7.61 (td,  $J = 7.8, 1.8$  Hz, 1H), 7.65 (s, 1H), 7.65 (t,  $J = 4.1$  Hz, 1H), 8.48 (d,  $J = 4.1$  Hz, 1H), 12.19 (s, 1H);  $^{13}C$  NMR (150 MHz,  $CDCl_3$ )  $\delta$  111.6 (dd,  $J = 20, 4.0$  Hz), 111.9, 120.1, 122.5, 132.8 (t,  $J = 10$  Hz), 136.6, 149.2, 149.3, 151.4, 158.4, 158.9, 159.7 (dd,  $J = 253, 5.8$  Hz), 162.5; HRMS (ESI+) calcd for  $C_{15}H_{10}F_2N_3OS$   $[M + H]^+$  318.0507, found 318.0506 (error 0.3 ppm).

#### **2-[N-(3,4-Difluorobenzoyl)amino]-4-(pyridin-2-yl)thiazole (64)**

Synthesized from 50 mg 3,4-difluorophenylcarboxylic acid using general procedure C to obtain 63 mg (63%) of a pale yellow powder.  $R_f$  0.54 (DCM:MeOH 9:1);  $^1H$  NMR (600 MHz,  $CDCl_3$ )  $\delta$

7.08 (td,  $J = 9.0, 8.4$  Hz, 1H), 7.14 (dd,  $J = 4.8, 1.2$  Hz, 1H), 7.53 (m, 1H), 7.61 (td,  $J = 7.8, 1.8$  Hz, 1H), 7.67 (td,  $J = 7.2, 1.8$  Hz, 1H), 7.72 (d,  $J = 7.2$  Hz, 1H), 7.73 (s, 1H), 8.53 (d,  $J = 4.2$  Hz, 1H), 11.13 (s, 1H);  $^{13}\text{C}$  NMR (150 MHz,  $\text{CDCl}_3$ )  $\delta$  112.4, 117.5 (d,  $J = 18.9$  Hz), 117.8 (d,  $J = 17.9$  Hz), 120.4, 122.7, 124.0 (dd,  $J = 7.5, 3.6$  Hz), 129.2, 136.7, 149.56, 149.62, 150.3 (dd,  $J = 251, 12.6$  Hz), 151.8, 153.2 (dd,  $J = 256, 12.6$  Hz), 159.0, 163.3; HRMS (ESI+) calcd for  $\text{C}_{15}\text{H}_{10}\text{F}_2\text{N}_3\text{OS}$   $[\text{M} + \text{H}]^+$  318.0507, found 318.0500 (error 2.2 ppm).

#### **2-[N-(3,5-Difluorobenzoyl)amino]-4-(pyridin-2-yl)thiazole (65)**

Synthesized from 77 mg 3,5-difluorobenzoic acid using general procedure C to obtain 91 mg (82%) of a colorless crystalline solid.  $R_f$  0.50 (DCM:MeOH = 9:1);  $^1\text{H}$  NMR (600 MHz,  $\text{CDCl}_3$ )  $\delta$  7.03 (t,  $J = 8.2$  Hz, 1H), 7.25 (t,  $J = 6.0$  Hz, 1H), 7.60 (d,  $J = 5.9$  Hz, 2H), 7.64 (s, 1H), 7.77 (t,  $J = 7.6$  Hz, 1H), 7.91 (d,  $J = 7.6$  Hz, 1H), 8.53 (d,  $J = 4.1$  Hz, 1H);  $^{13}\text{C}$  NMR (150 MHz,  $\text{CDCl}_3$ )  $\delta$  108.1 (t,  $J = 25.4$  Hz), 111.4 (dd,  $J = 20.7, 5.7$  Hz), 112.9, 121.5, 123.2, 135.7 (t,  $J = 8.6$  Hz), 137.9, 149.0, 149.3, 152.2, 159.0, 163.3 (dd,  $J = 249, 11.4$  Hz), 163.8 (t,  $J = 2.4$  Hz); HRMS (ESI+) calcd for  $\text{C}_{15}\text{H}_{10}\text{F}_2\text{N}_3\text{OS}$   $[\text{M} + \text{H}]^+$  318.0507, found 318.0512 (error 1.6 ppm).

#### **2-[N-(2-Chloro-6-fluorobenzoyl)amino]-4-(pyridin-2-yl)thiazole (66)**

Synthesized from 85 mg 2-chloro-6-fluorobenzoic acid using general procedure C to obtain 70 mg (60%) of a yellowish solid.  $R_f$  0.61 (DCM:MeOH = 9:1);  $^1\text{H}$  NMR (600 MHz,  $\text{CDCl}_3$ )  $\delta$  6.57 (t,  $J = 8.5$  Hz, 1H), 6.81 (d,  $J = 8.2$  Hz, 1H), 7.00 (m, 1H), 7.17 (t,  $J = 6.0$  Hz, 1H), 7.65 (t,  $J = 7.5$  Hz, 1H), 7.68 (t,  $J = 8.1$  Hz, 1H), 7.68 (s, 1H), 8.51 (d,  $J = 4.7$  Hz, 1H), 12.39 (s, 1H);  $^{13}\text{C}$  NMR (150 MHz,  $\text{CDCl}_3$ )  $\delta$  112.2, 113.9 (d,  $J = 21.8$  Hz), 120.2, 122.5 (d,  $J = 19.7$  Hz), 122.7, 125.2 (d,  $J = 2.3$  Hz), 132.0 (d,  $J = 9.2$  Hz), 132.2 (d,  $J = 4.7$  Hz), 136.9, 148.8, 149.2, 151.0, 159.2 (d,  $J = 252$  Hz), 159.7, 160.4; HRMS (ESI+) calcd for  $\text{C}_{15}\text{H}_{10}\text{ClFN}_3\text{OS}$   $[\text{M} + \text{H}]^+$  334.0212, found 334.0205 (error 2.1 ppm).

#### **2-[N-(2-Chloropyridin-3-oyl)amino]-4-(pyridin-2-yl)thiazole (67)**

Synthesized from 77 mg 2-chloronicotinic acid using general procedure C to obtain 91 mg (82%) of a yellow powder.  $R_f$  0.61 (DCM:MeOH = 9:1);  $^1\text{H}$  NMR (600 MHz,  $\text{CDCl}_3$ )  $\delta$  6.96 (dd,  $J = 7.6, 4.7$  Hz, 1H), 7.11 (dd,  $J = 8.4, 4.8$  Hz, 1H), 7.59 (m, 2H), 7.65 (s, 1H), 7.69 (dd,  $J = 7.6, 1.8$  Hz, 1H), 8.18 (dd,  $J = 4.7, 1.8$  Hz, 1H), 8.46 (d,  $J = 4.7$  Hz, 1H), 12.29 (s, 1H);  $^{13}\text{C}$  NMR (150 MHz,  $\text{CDCl}_3$ )  $\delta$  112.5, 120.1, 121.9, 122.7, 129.3, 136.6, 138.5, 147.3, 149.2, 149.3, 151.2, 151.3, 158.9, 163.1; HRMS (ESI+) calcd for  $\text{C}_{14}\text{H}_{10}\text{ClN}_4\text{OS}$   $[\text{M} + \text{H}]^+$  317.0258, found 317.0253 (error 1.6 ppm).

#### **2-[N-(Pyridin-2-oyl)amino]-4-(pyridin-2-yl)thiazole (68)**

Synthesized from 48 mg picolinic acid using general procedure C to obtain 58 mg (59%) of a colorless powder.  $R_f$  0.84 (DCM:MeOH = 9:1);  $^1\text{H}$  NMR (600 MHz,  $\text{CDCl}_3$ )  $\delta$  7.24 (dd,  $J = 4.8, 6.6$  Hz, 1H), 7.54 (ddd,  $J = 6.6, 7.8, 1.2$  Hz, 1H), 7.76 (dt,  $J = 7.8, 1.8$  Hz, 1H), 7.77 (s, 1H), 7.94 (dt,  $J = 7.8, 1.2$  Hz, 1H), 8.01 (d,  $J = 7.8$  Hz, 1H), 8.30 (d,  $J = 7.8$  Hz, 1H), 8.64 (d,  $J = 4.8$  Hz, 1H), 8.67 (d,  $J = 4.8$  Hz, 1H), 11.26 (s, 1H);  $^{13}\text{C}$  NMR (150 MHz,  $\text{CDCl}_3$ )  $\delta$  112.1, 120.7, 122.5, 122.7, 127.2, 136.9, 137.6, 147.6, 148.5, 149.3, 150.0, 152.2, 157.3, 162.0; HRMS (ESI+) calcd for  $\text{C}_{14}\text{H}_{11}\text{N}_4\text{OS}$   $[\text{M} + \text{H}]^+$  283.0648, found 283.0651 (error 1.1 ppm).

**2-[N-(Pyridin-3-oyl)amino]-4-(pyridin-2-yl)thiazole (69)**

Synthesized from 50 mg 3-pyridylcarboxylic acid using general procedure C to obtain 58 mg (51%) of a pale yellow powder.  $R_f$  0.33 (DCM:MeOH 9:1);  $^1\text{H}$  NMR (600 MHz,  $\text{CD}_3\text{OD}$ )  $\delta$  7.35 (ddd,  $J = 7.5, 4.8, 1.2$  Hz, 1H), 7.64 (ddd,  $J = 7.9, 4.8, 0.7$  Hz, 1H), 7.84 (s, 1H), 7.90 (td,  $J = 7.6, 1.8$  Hz, 1H), 8.13 (d,  $J = 7.9$  Hz, 1H), 8.47 (dt,  $J = 8.0, 2.0$  Hz, 1H), 8.57 (ddd,  $J = 5.0, 1.8, 0.9$  Hz, 1H), 8.78 (dd,  $J = 4.8, 1.6$  Hz, 1H), 9.20 (dd,  $J = 2.2, 0.7$  Hz, 1H);  $^{13}\text{C}$  NMR (150 MHz,  $\text{CDCl}_3$ )  $\delta$  112.4, 120.9, 122.8, 123.7, 128.5, 135.9, 137.3, 148.7, 149.1, 152.0, 152.7, 155.8, 158.7, 163.8; HRMS (ESI+) calcd for  $\text{C}_{14}\text{H}_{11}\text{N}_4\text{OS}$   $[\text{M} + \text{H}]^+$  283.0648, found 283.0651 (error 1.1 ppm).

**2-[N-(Pyridin-4-oyl)amino]-4-(pyridin-2-yl)thiazole (70)**

Synthesized from 50 mg 4-pyridylcarboxylic acid using general procedure C to obtain 57 mg (50%) of a pale yellow powder.  $R_f$  0.35 (DCM:MeOH 9:1);  $^1\text{H}$  NMR (600 MHz,  $\text{CD}_3\text{OD}$ )  $\delta$  7.34 (ddd,  $J = 7.2, 4.8, 1.2$  Hz, 1H), 7.84 (s, 1H), 7.88 (td,  $J = 7.8, 1.8$  Hz, 1H), 7.97 (d,  $J = 4.8$  Hz, 1H), 7.98 (d,  $J = 4.8$  Hz, 1H), 8.11 (d,  $J = 7.8$  Hz, 1H), 8.56 (d,  $J = 4.8$  Hz, 1H), 8.77 (d,  $J = 4.8$  Hz, 1H), 8.78 (d,  $J = 4.8$  Hz, 1H);  $^{13}\text{C}$  NMR (150 MHz,  $\text{CD}_3\text{OD}$ )  $\delta$  113.8, 122.6, 123.3, 124.3, 139.0, 142.1, 150.2, 150.8, 151.4, 153.7, 160.0, 165.7; HRMS (ESI+) calcd for  $\text{C}_{14}\text{H}_{11}\text{N}_4\text{OS}$   $[\text{M} + \text{H}]^+$  283.0648, found 283.0653 (error 1.8 ppm).

**Table S1.** HPLC purity of all final compounds.

| compd | molecular formula                                               | HPLC purity |        | compd | molecular formula                                               | HPLC purity |        |
|-------|-----------------------------------------------------------------|-------------|--------|-------|-----------------------------------------------------------------|-------------|--------|
|       |                                                                 | 254 nm      | 220 nm |       |                                                                 | 254 nm      | 220 nm |
| 1     | C <sub>14</sub> H <sub>11</sub> N <sub>3</sub> S                | 94.4        | 95.6   | 39    | C <sub>22</sub> H <sub>17</sub> N <sub>3</sub> O <sub>2</sub> S | 96.6        | n.d.   |
| 2     | C <sub>15</sub> H <sub>13</sub> N <sub>3</sub> S                | 99.8        | 99.4   | 40    | C <sub>22</sub> H <sub>17</sub> N <sub>3</sub> O <sub>2</sub> S | 97.3        | 97.4   |
| 3     | C <sub>15</sub> H <sub>13</sub> N <sub>3</sub> S                | 99.9        | 99.9   | 41    | C <sub>22</sub> H <sub>17</sub> N <sub>3</sub> O <sub>2</sub> S | 98.6        | 99.1   |
| 4     | C <sub>15</sub> H <sub>13</sub> N <sub>3</sub> S                | 99.9        | 99.9   | 42    | C <sub>16</sub> H <sub>13</sub> N <sub>3</sub> O <sub>2</sub> S | 98.5        | 99.0   |
| 5     | C <sub>16</sub> H <sub>15</sub> N <sub>3</sub> S                | 99.5        | 99.2   | 43    | C <sub>16</sub> H <sub>13</sub> N <sub>3</sub> O <sub>2</sub> S | 99.9        | 99.9   |
| 6     | C <sub>16</sub> H <sub>15</sub> N <sub>3</sub> S                | 99.7        | 99.8   | 44    | C <sub>16</sub> H <sub>13</sub> N <sub>3</sub> O <sub>2</sub> S | 99.8        | 99.9   |
| 7     | C <sub>16</sub> H <sub>15</sub> N <sub>3</sub> S                | 99.9        | 99.9   | 45    | C <sub>15</sub> H <sub>11</sub> N <sub>3</sub> O <sub>2</sub> S | 89.8        | 92.4   |
| 8     | C <sub>16</sub> H <sub>15</sub> N <sub>3</sub> O <sub>2</sub> S | 99.5        | 99.4   | 46    | C <sub>17</sub> H <sub>13</sub> N <sub>3</sub> O <sub>2</sub> S | 98.4        | n.d.   |
| 9     | C <sub>16</sub> H <sub>15</sub> N <sub>3</sub> O <sub>2</sub> S | 99.9        | 99.9   | 47    | C <sub>17</sub> H <sub>13</sub> N <sub>3</sub> O <sub>2</sub> S | 99.9        | 99.9   |
| 10    | C <sub>14</sub> H <sub>10</sub> FN <sub>3</sub> S               | 99.7        | 99.8   | 51    | C <sub>15</sub> H <sub>10</sub> BrN <sub>3</sub> OS             | 99.9        | 99.9   |
| 11    | C <sub>14</sub> H <sub>10</sub> FN <sub>3</sub> S               | 99.9        | 99.9   | 52    | C <sub>15</sub> H <sub>10</sub> BrN <sub>3</sub> OS             | 99.9        | 99.9   |
| 12    | C <sub>14</sub> H <sub>10</sub> FN <sub>3</sub> S               | 99.8        | 99.9   | 53    | C <sub>15</sub> H <sub>10</sub> BrN <sub>3</sub> OS             | 99.9        | 99.9   |
| 13    | C <sub>15</sub> H <sub>10</sub> F <sub>3</sub> N <sub>3</sub> S | n.d.        | 99.9   | 54    | C <sub>15</sub> H <sub>10</sub> CIN <sub>3</sub> OS             | 95.7        | 92.7   |
| 14    | C <sub>15</sub> H <sub>10</sub> F <sub>3</sub> N <sub>3</sub> S | 99.2        | 99.8   | 55    | C <sub>15</sub> H <sub>10</sub> CIN <sub>3</sub> OS             | 99.0        | 99.9   |
| 15    | C <sub>15</sub> H <sub>10</sub> F <sub>3</sub> N <sub>3</sub> S | 99.9        | 99.7   | 56    | C <sub>15</sub> H <sub>10</sub> CIN <sub>3</sub> OS             | 98.5        | 96.9   |
| 16    | C <sub>14</sub> H <sub>11</sub> N <sub>3</sub> OS               | 96.2        | 96.3   | 57    | C <sub>15</sub> H <sub>10</sub> FN <sub>3</sub> OS              | 98.5        | 99.6   |
| 17    | C <sub>13</sub> H <sub>10</sub> N <sub>4</sub> S                | 99.8        | 99.9   | 58    | C <sub>15</sub> H <sub>10</sub> FN <sub>3</sub> OS              | 99.3        | 99.3   |
| 18    | C <sub>13</sub> H <sub>9</sub> CIN <sub>4</sub> S               | 99.9        | 99.5   | 59    | C <sub>15</sub> H <sub>10</sub> FN <sub>3</sub> OS              | 99.8        | 99.9   |
| 19    | C <sub>14</sub> H <sub>12</sub> N <sub>4</sub> S                | 99.7        | 99.4   | 60    | C <sub>15</sub> H <sub>9</sub> F <sub>2</sub> N <sub>3</sub> OS | 95.2        | 96.9   |
| 21    | C <sub>12</sub> H <sub>13</sub> N <sub>3</sub> OS               | 99.5        | 99.9   | 61    | C <sub>15</sub> H <sub>9</sub> F <sub>2</sub> N <sub>3</sub> OS | 99.2        | 98.1   |
| 22    | C <sub>14</sub> H <sub>17</sub> N <sub>3</sub> OS               | 99.5        | 99.9   | 62    | C <sub>15</sub> H <sub>9</sub> F <sub>2</sub> N <sub>3</sub> OS | 99.9        | 99.9   |
| 23    | C <sub>16</sub> H <sub>21</sub> N <sub>3</sub> OS               | 99.8        | 99.9   | 63    | C <sub>15</sub> H <sub>9</sub> F <sub>2</sub> N <sub>3</sub> OS | 98.1        | 98.7   |
| 24    | C <sub>18</sub> H <sub>25</sub> N <sub>3</sub> OS               | 98.4        | 98.6   | 64    | C <sub>15</sub> H <sub>9</sub> F <sub>2</sub> N <sub>3</sub> OS | 96.7        | 95.6   |
| 25    | C <sub>12</sub> H <sub>11</sub> N <sub>3</sub> OS               | 99.5        | 99.9   | 65    | C <sub>15</sub> H <sub>9</sub> F <sub>2</sub> N <sub>3</sub> OS | 96.7        | 98.9   |
| 26    | C <sub>13</sub> H <sub>13</sub> N <sub>3</sub> OS               | 99.9        | 99.9   | 66    | C <sub>15</sub> H <sub>9</sub> ClFN <sub>3</sub> OS             | 95.5        | 98.7   |
| 27    | C <sub>14</sub> H <sub>15</sub> N <sub>3</sub> OS               | 99.9        | 99.9   | 67    | C <sub>14</sub> H <sub>9</sub> CIN <sub>4</sub> OS              | 99.9        | 99.9   |
| 28    | C <sub>15</sub> H <sub>17</sub> N <sub>3</sub> OS               | 99.4        | 99.3   | 68    | C <sub>14</sub> H <sub>10</sub> N <sub>4</sub> OS               | 99.9        | 99.7   |
| 29    | C <sub>13</sub> H <sub>13</sub> N <sub>3</sub> OS               | 99.2        | 99.2   | 69    | C <sub>14</sub> H <sub>10</sub> N <sub>4</sub> OS               | 96.5        | 97.6   |
| 30    | C <sub>13</sub> H <sub>9</sub> N <sub>3</sub> O <sub>2</sub> S  | 99.0        | 95.2   | 70    | C <sub>14</sub> H <sub>10</sub> N <sub>4</sub> OS               | 99.2        | 99.6   |
| 31    | C <sub>13</sub> H <sub>9</sub> N <sub>3</sub> O <sub>2</sub> S  | 99.1        | 99.8   | 71    | C <sub>16</sub> H <sub>13</sub> N <sub>3</sub> OS               | 96.9        | 98.2   |
| 32    | C <sub>13</sub> H <sub>9</sub> N <sub>3</sub> OS <sub>2</sub>   | 99.7        | 99.8   | 73    | C <sub>15</sub> H <sub>11</sub> N <sub>3</sub> OS               | 98.4        | 99.9   |
| 33    | C <sub>13</sub> H <sub>9</sub> N <sub>3</sub> OS <sub>2</sub>   | 99.8        | 95.3   | 78    | C <sub>15</sub> H <sub>12</sub> N <sub>4</sub> O                | 98.0        | 99.9   |
| 34    | C <sub>12</sub> H <sub>8</sub> N <sub>4</sub> OS <sub>2</sub>   | 96.3        | 91.9   | 82    | C <sub>15</sub> H <sub>11</sub> N <sub>3</sub> O <sub>2</sub>   | 99.9        | 99.9   |
| 35    | C <sub>15</sub> H <sub>11</sub> N <sub>3</sub> OS               | 99.9        | 99.9   | 83    | C <sub>14</sub> H <sub>9</sub> FN <sub>4</sub> O <sub>2</sub>   | 99.8        | 99.6   |
| 36    | C <sub>16</sub> H <sub>13</sub> N <sub>3</sub> OS               | 98.6        | 98.9   | 86    | C <sub>14</sub> H <sub>9</sub> FN <sub>4</sub> OS               | 99.8        | 99.7   |
| 37    | C <sub>16</sub> H <sub>13</sub> N <sub>3</sub> OS               | 99.5        | 99.9   | 91    | C <sub>14</sub> H <sub>10</sub> N <sub>4</sub> OS               | 75.8        | 82.2   |
| 38    | C <sub>16</sub> H <sub>13</sub> N <sub>3</sub> OS               | 99.3        | 98.5   | 92    | C <sub>13</sub> H <sub>9</sub> N <sub>3</sub> OS <sub>2</sub>   | 99.0        | 99.2   |
